# Supplementary material for: Ionic liquid phase synthesis (IoLiPS) of 2-aminothiazoles and imidazo[1,2-a]pyridines
Source: Royal Society of Chemistry journal article supplement (doi:10.1039/c4ra08009b), 2014-09-18
Supplement: c4ra08009b1.pdf [file c4ra08009b1.pdf]

## Supporting Information

### Ionic Liquid Phase Synthesis (IoLiPS) of 2-aminothiazoles and imidazo[1,2-*a*]pyridines

Sunita Choudhary,<sup>‡</sup> Manoj Kumar Muthyala<sup>‡</sup> and Anil Kumar\*

#### Content:

Copies of <sup>1</sup>H and <sup>13</sup>C NMR spectra of **5**, **7a**, **9a-g** & **11a-g**

\*Corresponding Author

A. Kumar: Department of Chemistry, Birla Institute of Technology and Science, Pilani,  
Rajasthan (INDIA), PIN-333 031; Phone: +-91-1596-245652; Fax: +91-1596-244183;  
E-mail: [anilkumar@pilani.bits-pilani.ac.in](mailto:anilkumar@pilani.bits-pilani.ac.in)

<sup>‡</sup>Both authors contributed equally

Copies of <sup>1</sup>H and <sup>13</sup>C NMR spectra of 5, 7a, 9a-g & 11a-g

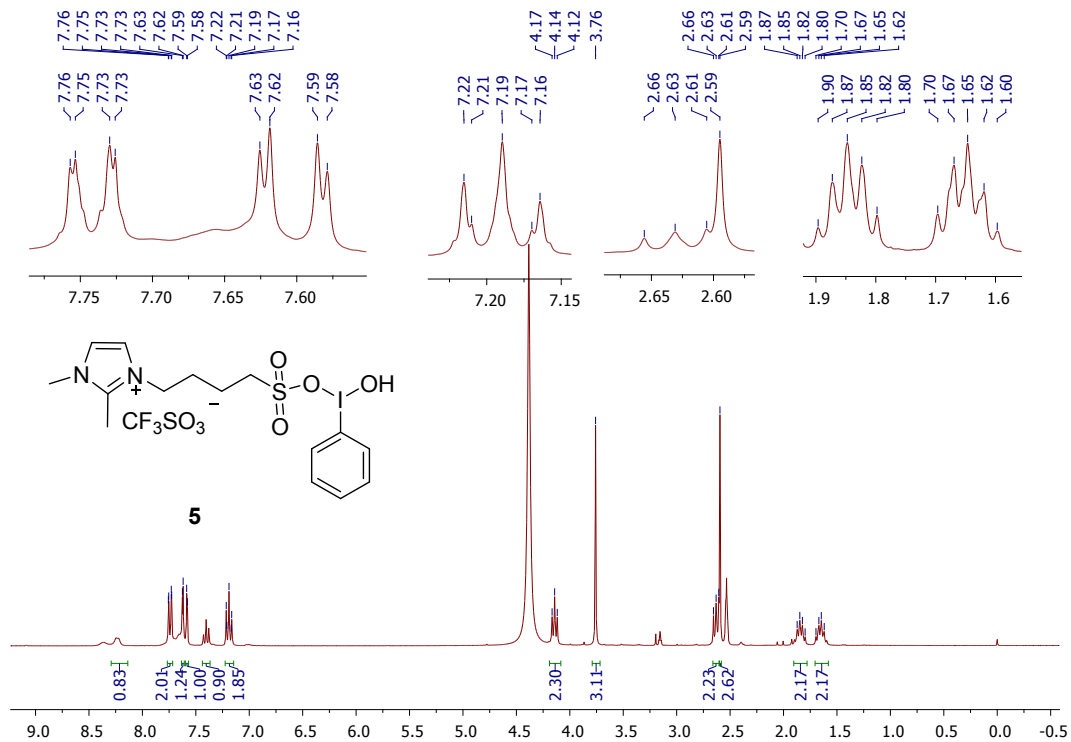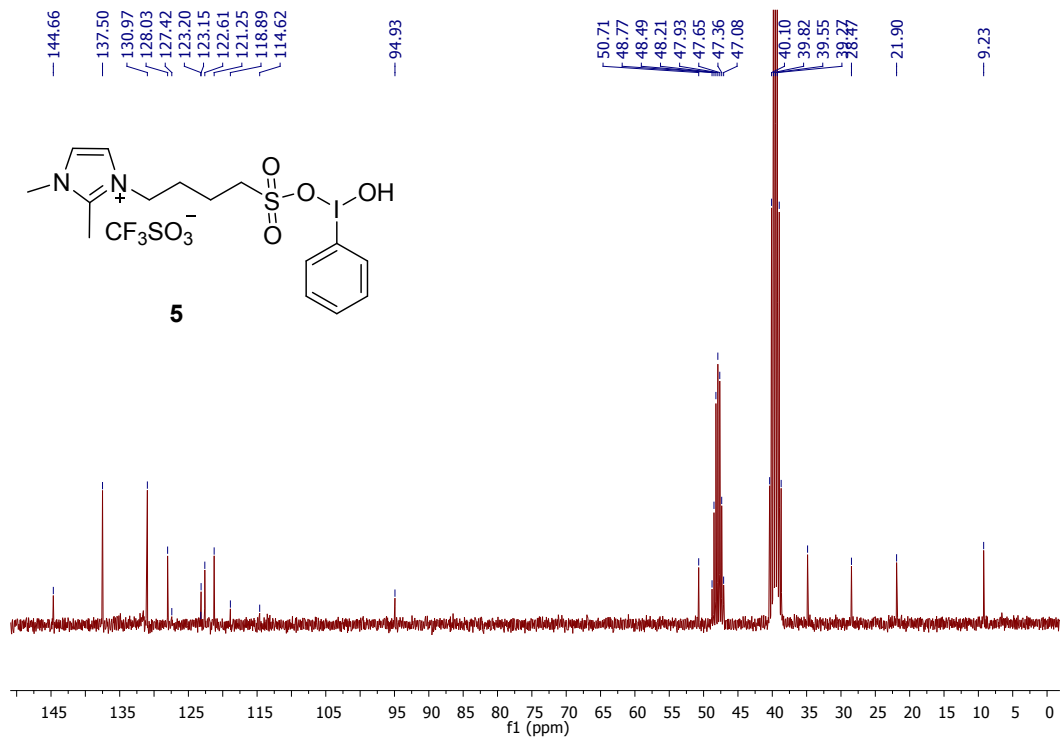

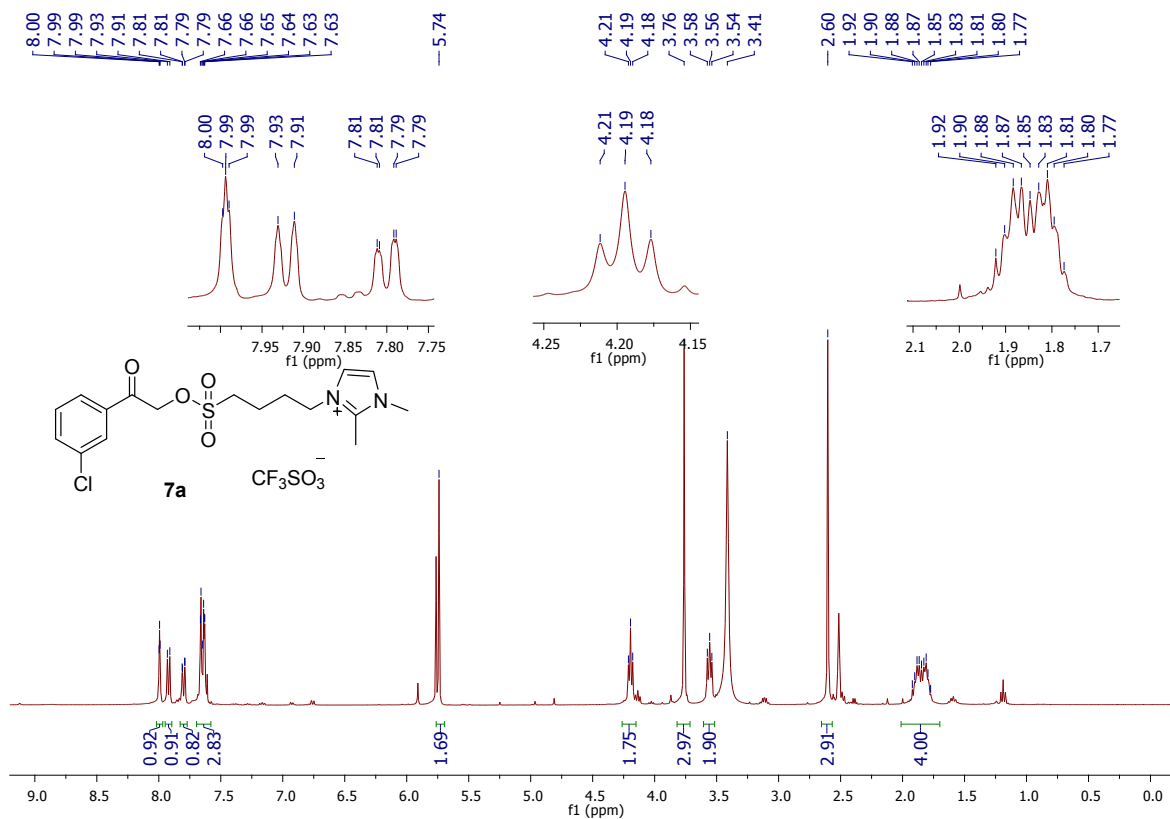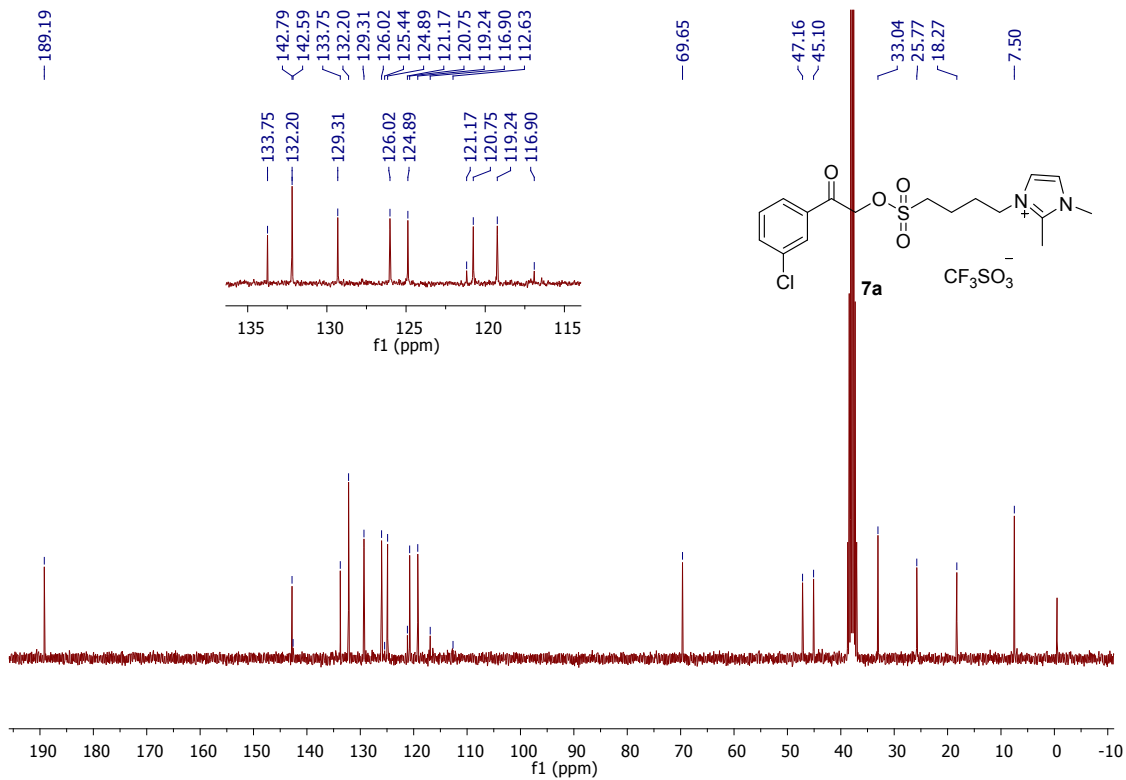

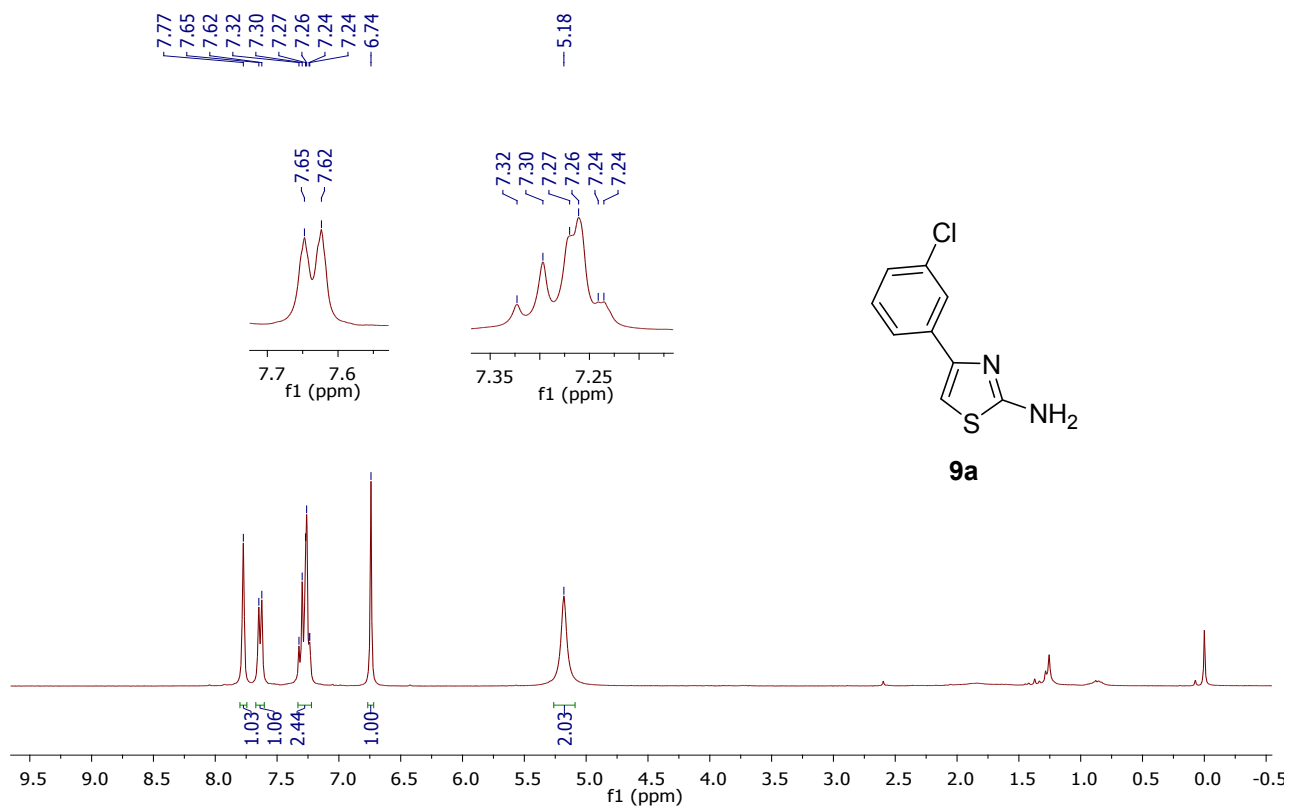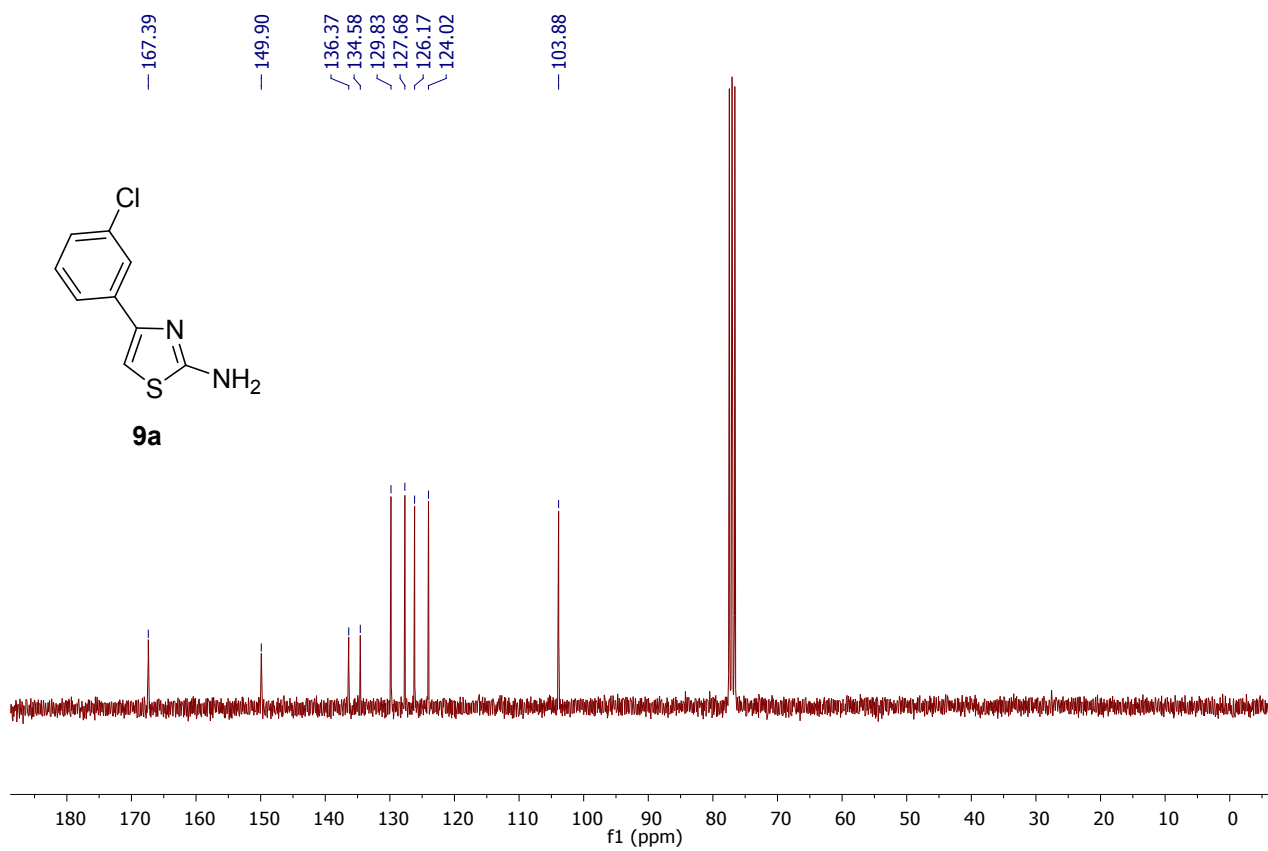

**SAMPLE INFORMATION**

|                   |                          |                     |              |
|-------------------|--------------------------|---------------------|--------------|
| Sample Name:      | S-350 2-aminothiazole    | Acquired By:        | System       |
| Sample Type:      | Unknown                  | Sample Set Name:    |              |
| Vial:             | 1                        | Acq. Method Set:    | poonam       |
| Injection #:      | 38                       | Processing Method:  | S10          |
| Injection Volume: | 10.00 ul                 | Channel Name:       | 250.0nm      |
| Run Time:         | 12.0 Minutes             | Proc. Chnl. Descr.: | PDA 250.0 nm |
| Date Acquired:    | 9/7/2014 9:33:37 PM IST  |                     |              |
| Date Processed:   | 9/14/2014 8:17:27 PM IST |                     |              |

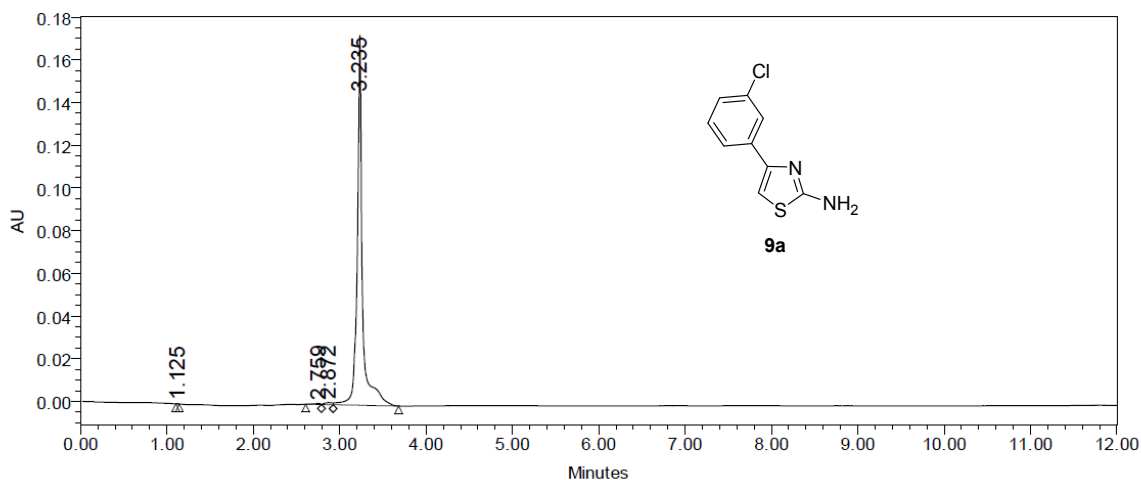

Channel: 2998; Processed Channel: PDA 250.0 nm; Result Id: 2277; Processing Method: S10

**Processed Channel Descr.: PDA 250.0 nm**

|   | Processed Channel Descr. | RT    | Area   | % Area | Height |
|---|--------------------------|-------|--------|--------|--------|
| 1 | PDA 250.0 nm             | 1.125 | 56     | 0.01   | 70     |
| 2 | PDA 250.0 nm             | 2.759 | 2814   | 0.39   | 498    |
| 3 | PDA 250.0 nm             | 2.872 | 6094   | 0.84   | 963    |
| 4 | PDA 250.0 nm             | 3.235 | 717234 | 98.77  | 173358 |

7.71  
7.36  
7.35  
6.73  
5.10

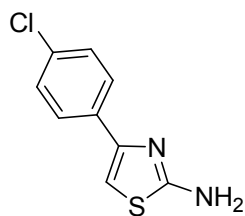

9b

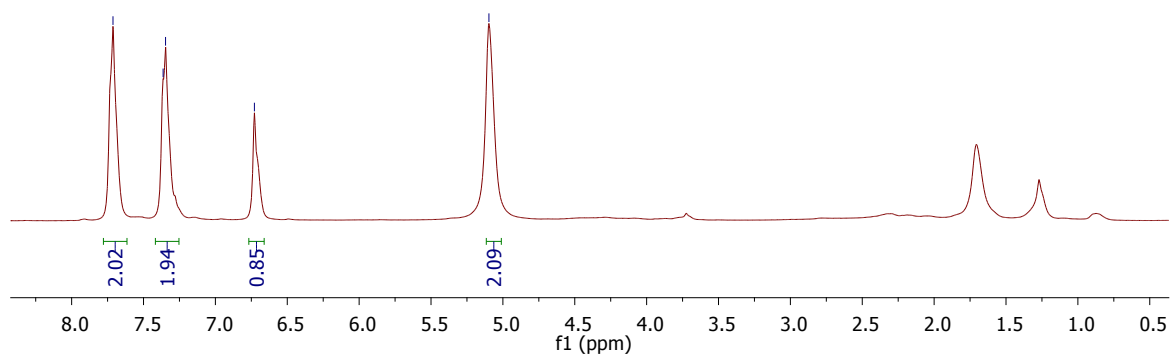

167.33  
135.42  
133.52  
133.19  
128.80  
127.34  
103.29

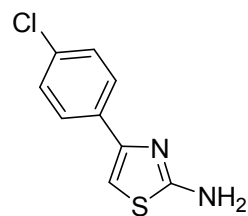

9b

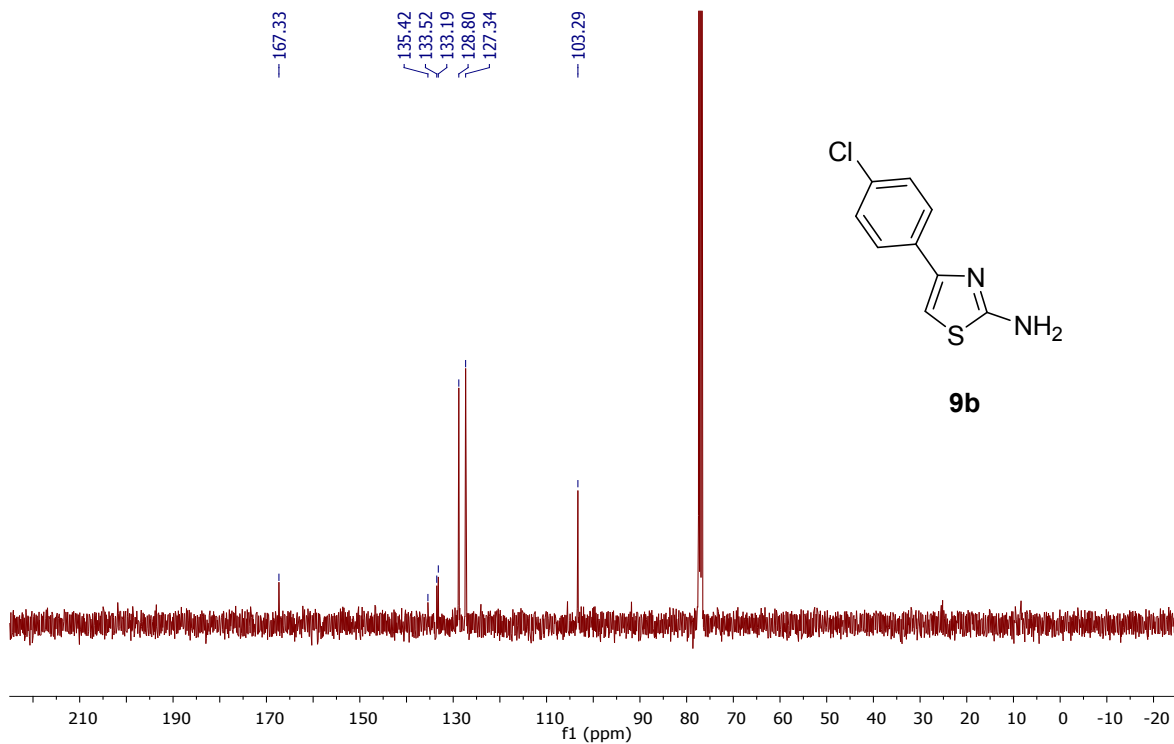

**SAMPLE INFORMATION**

|                   |                          |                     |              |
|-------------------|--------------------------|---------------------|--------------|
| Sample Name:      | S-317 Thiazole           | Acquired By:        | System       |
| Sample Type:      | Unknown                  | Sample Set Name:    |              |
| Vial:             | 1                        | Acq. Method Set:    | poonam       |
| Injection #:      | 22                       | Processing Method:  | S11          |
| Injection Volume: | 10.00 ul                 | Channel Name:       | 250.0nm      |
| Run Time:         | 12.0 Minutes             | Proc. Chnl. Descr.: | PDA 250.0 nm |
| Date Acquired:    | 9/8/2014 7:54:07 PM IST  |                     |              |
| Date Processed:   | 9/14/2014 9:36:31 PM IST |                     |              |

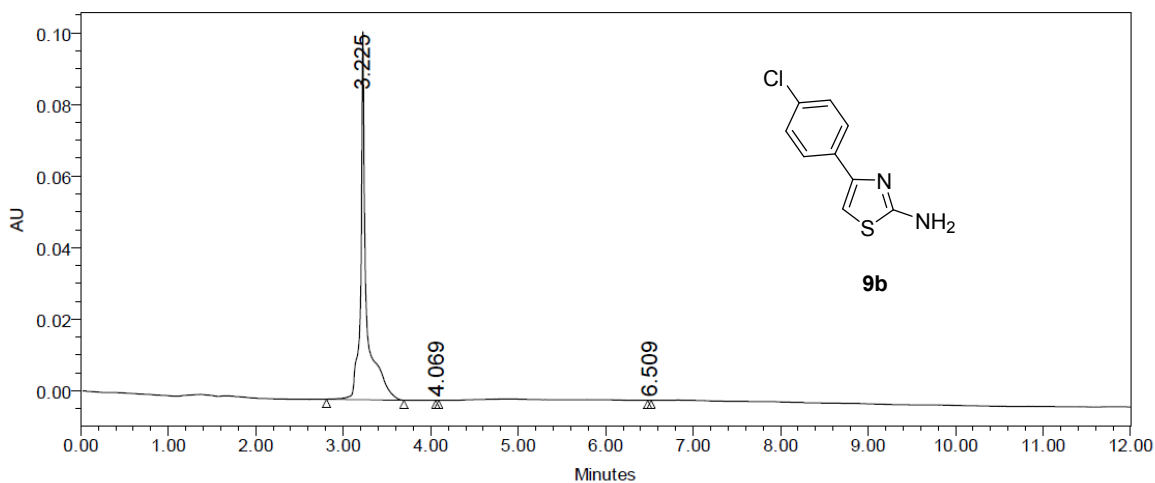

Channel: 2998; Processed Channel: PDA 250.0 nm; Result Id: 2299; Processing Method: S11

**Processed Channel Descr.: PDA 250.0 nm**

|   | Processed Channel Descr. | RT    | Area   | % Area | Height |
|---|--------------------------|-------|--------|--------|--------|
| 1 | PDA 250.0 nm             | 3.225 | 462345 | 99.99  | 102971 |
| 2 | PDA 250.0 nm             | 4.069 | 23     | 0.00   | 27     |
| 3 | PDA 250.0 nm             | 6.509 | 25     | 0.01   | 23     |

7.76  
7.74  
7.56  
7.54  
7.10  
7.08

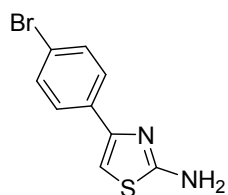

9c

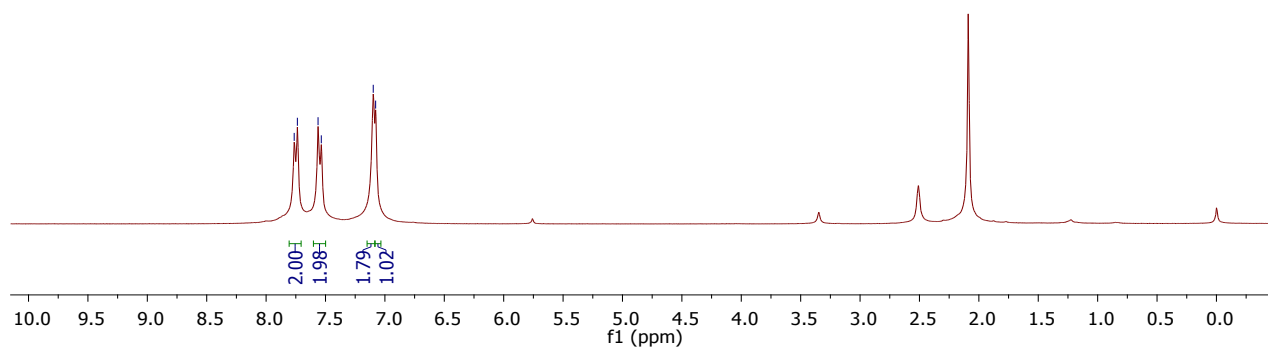

168.79  
149.08  
134.55  
131.81  
127.99  
120.54  
102.84

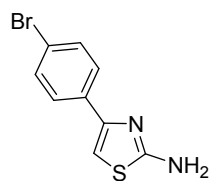

9c

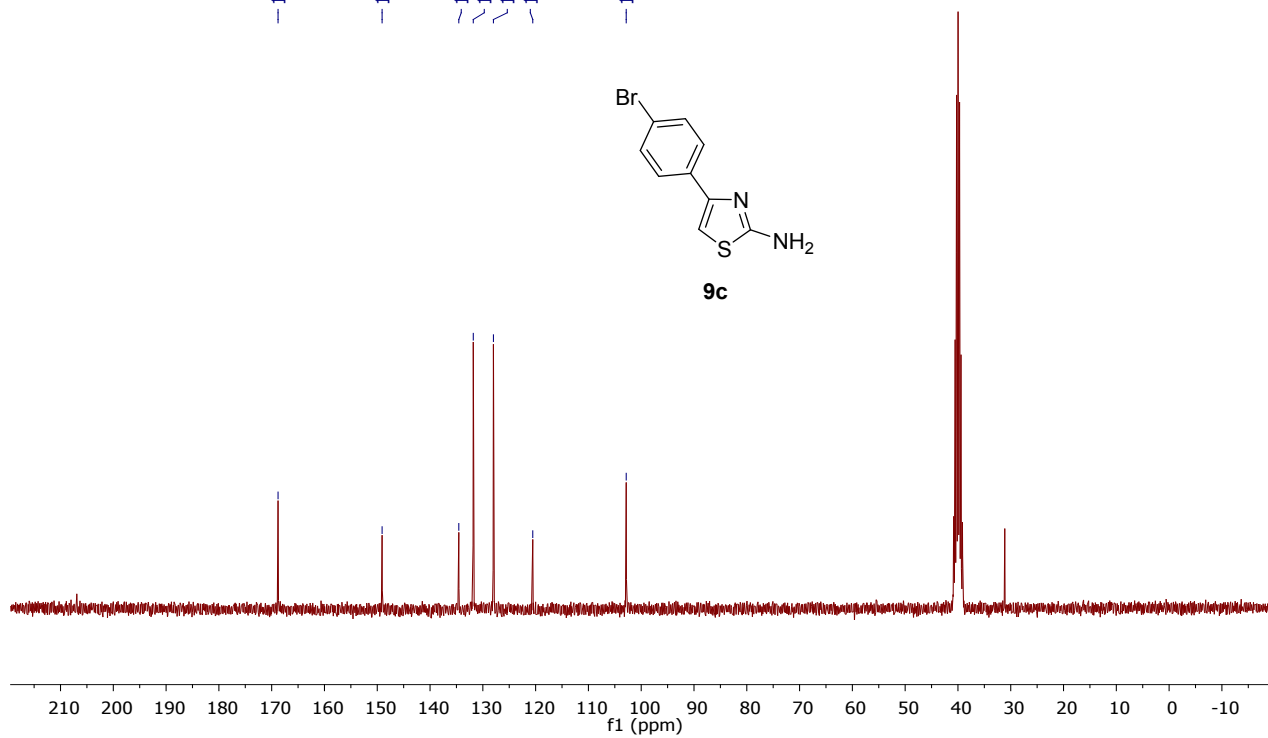



**SAMPLE INFORMATION**

|                   |                           |                     |              |
|-------------------|---------------------------|---------------------|--------------|
| Sample Name:      | 9c                        | Acquired By:        | System       |
| Sample Type:      | Unknown                   | Sample Set Name:    |              |
| Vial:             | 1                         | Acq. Method Set:    | poonam       |
| Injection #:      | 13                        | Processing Method:  | S13          |
| Injection Volume: | 10.00 ul                  | Channel Name:       | 250.0nm      |
| Run Time:         | 12.0 Minutes              | Proc. Chnl. Descr.: | PDA 250.0 nm |
| Date Acquired:    | 9/15/2014 12:09:53 AM IST |                     |              |
| Date Processed:   | 9/15/2014 12:30:49 AM IST |                     |              |

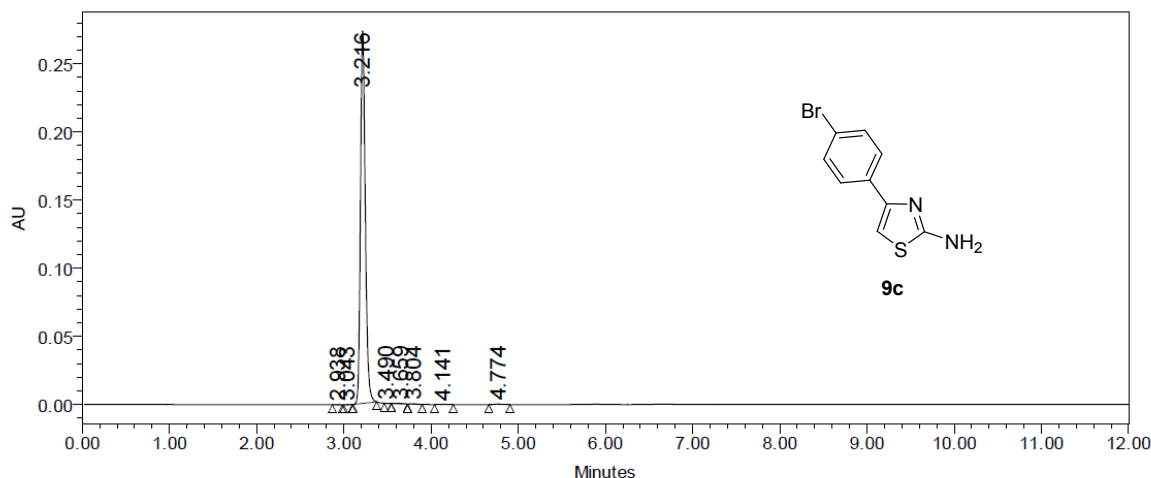

Channel: 2998; Processed Channel: PDA 250.0 nm; Result Id: 2334; Processing Method: S13

**Processed Channel Descr.: PDA 250.0 nm**

|   | Processed Channel Descr. | RT    | Area    | % Area | Height |
|---|--------------------------|-------|---------|--------|--------|
| 1 | PDA 250.0 nm             | 2.938 | 483     | 0.05   | 129    |
| 2 | PDA 250.0 nm             | 3.043 | 294     | 0.03   | 92     |
| 3 | PDA 250.0 nm             | 3.216 | 1054027 | 99.39  | 273592 |
| 4 | PDA 250.0 nm             | 3.490 | 93      | 0.01   | 40     |
| 5 | PDA 250.0 nm             | 3.659 | 1048    | 0.10   | 199    |
| 6 | PDA 250.0 nm             | 3.804 | 1173    | 0.11   | 242    |
| 7 | PDA 250.0 nm             | 4.141 | 924     | 0.09   | 150    |
| 8 | PDA 250.0 nm             | 4.774 | 2419    | 0.23   | 421    |

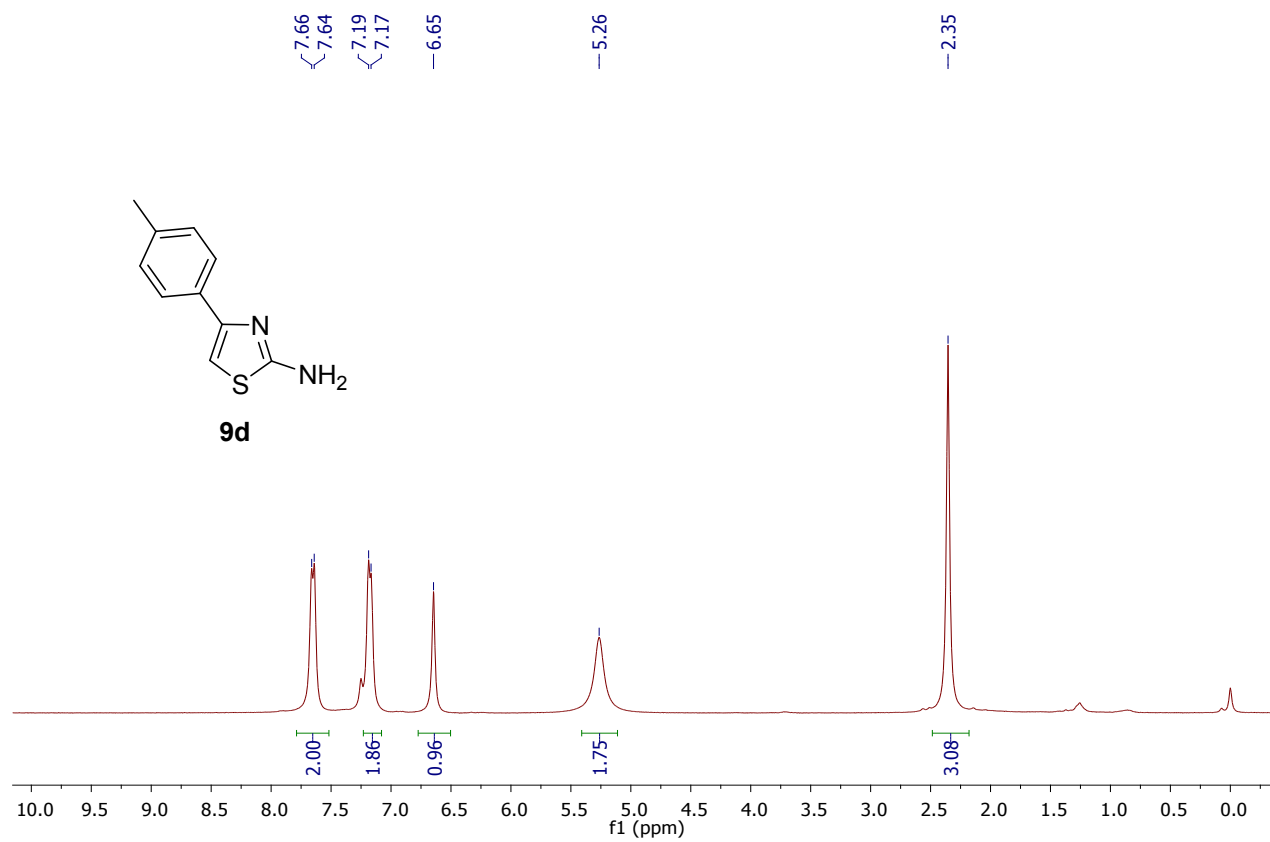

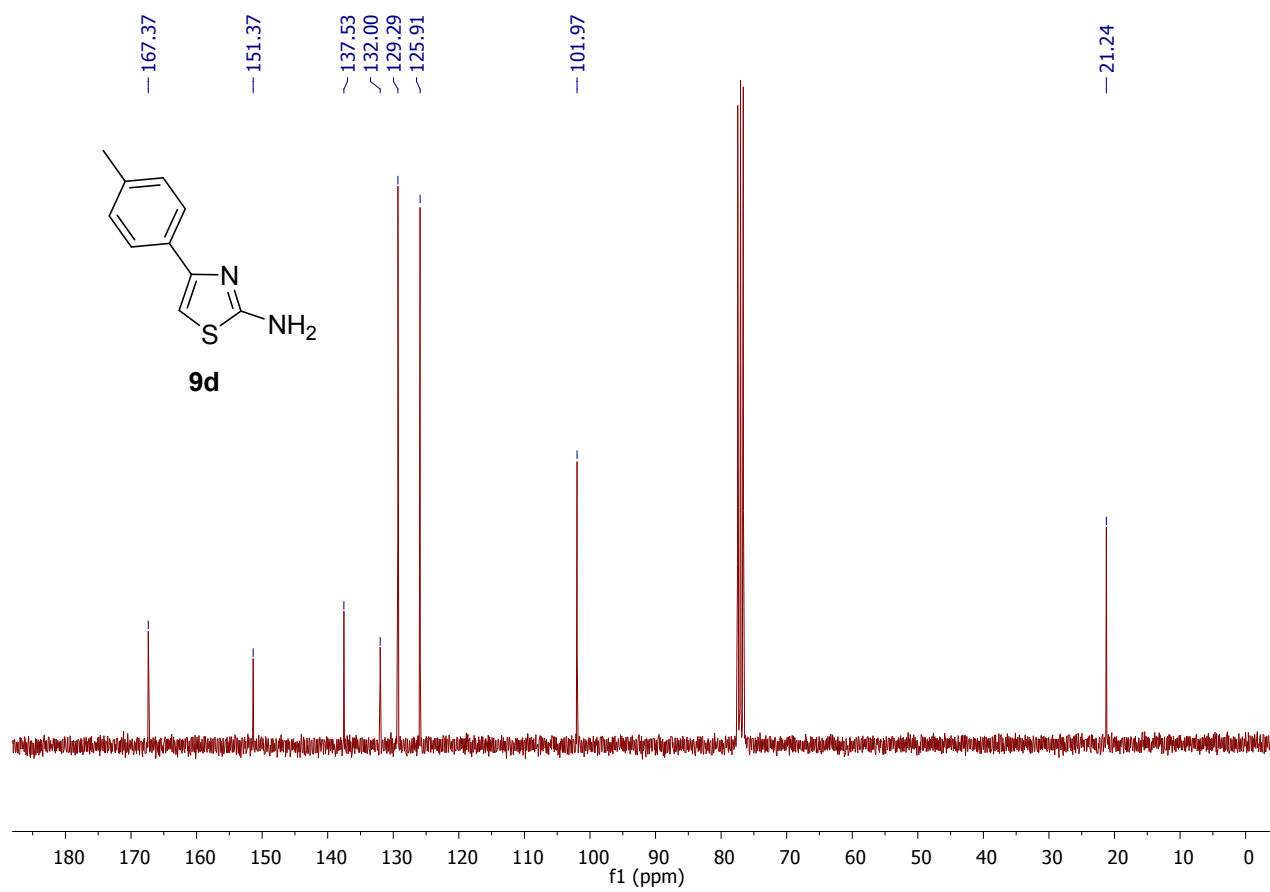

**SAMPLE INFORMATION**

|                   |                           |                     |              |
|-------------------|---------------------------|---------------------|--------------|
| Sample Name:      | Thiazole 821              | Acquired By:        | System       |
| Sample Type:      | Unknown                   | Sample Set Name:    |              |
| Vial:             | 1                         | Acq. Method Set:    | poonam       |
| Injection #:      | 36                        | Processing Method:  | S9           |
| Injection Volume: | 10.00 ul                  | Channel Name:       | 250.0nm      |
| Run Time:         | 12.0 Minutes              | Proc. Chnl. Descr.: | PDA 250.0 nm |
| Date Acquired:    | 9/14/2014 12:35:04 AM IST |                     |              |
| Date Processed:   | 9/14/2014 12:56:22 AM IST |                     |              |

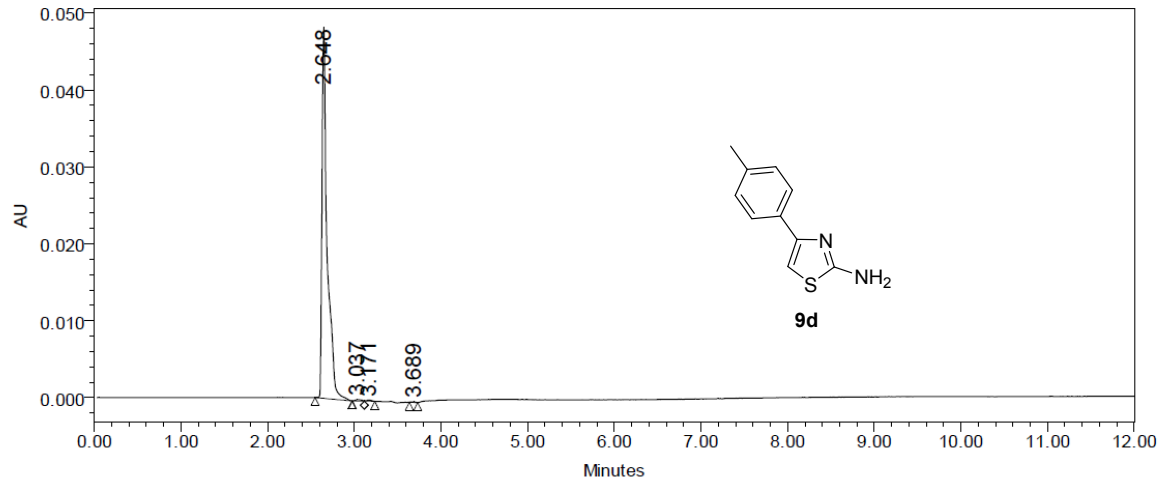

Channel: 2998; Processed Channel: PDA 250.0 nm; Result Id: 2249; Processing Method: S9

**Processed Channel Descr.: PDA 250.0 nm**

|   | Processed Channel Descr. | RT    | Area   | % Area | Height |
|---|--------------------------|-------|--------|--------|--------|
| 1 | PDA 250.0 nm             | 2.648 | 201433 | 99.13  | 48197  |
| 2 | PDA 250.0 nm             | 3.037 | 900    | 0.44   | 183    |
| 3 | PDA 250.0 nm             | 3.171 | 652    | 0.32   | 158    |
| 4 | PDA 250.0 nm             | 3.689 | 219    | 0.11   | 72     |

7.71  
7.69

6.92  
6.90  
6.58

3.83

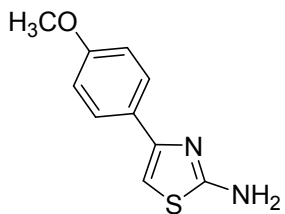

9e

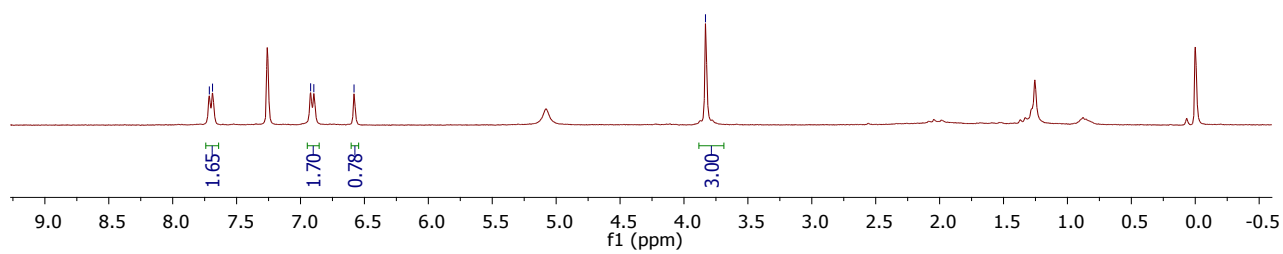

168.41

159.27

150.37

127.36  
127.19

113.93

100.53

55.25

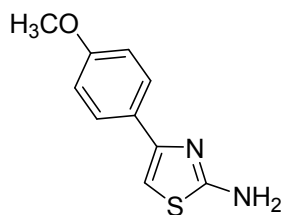

9e

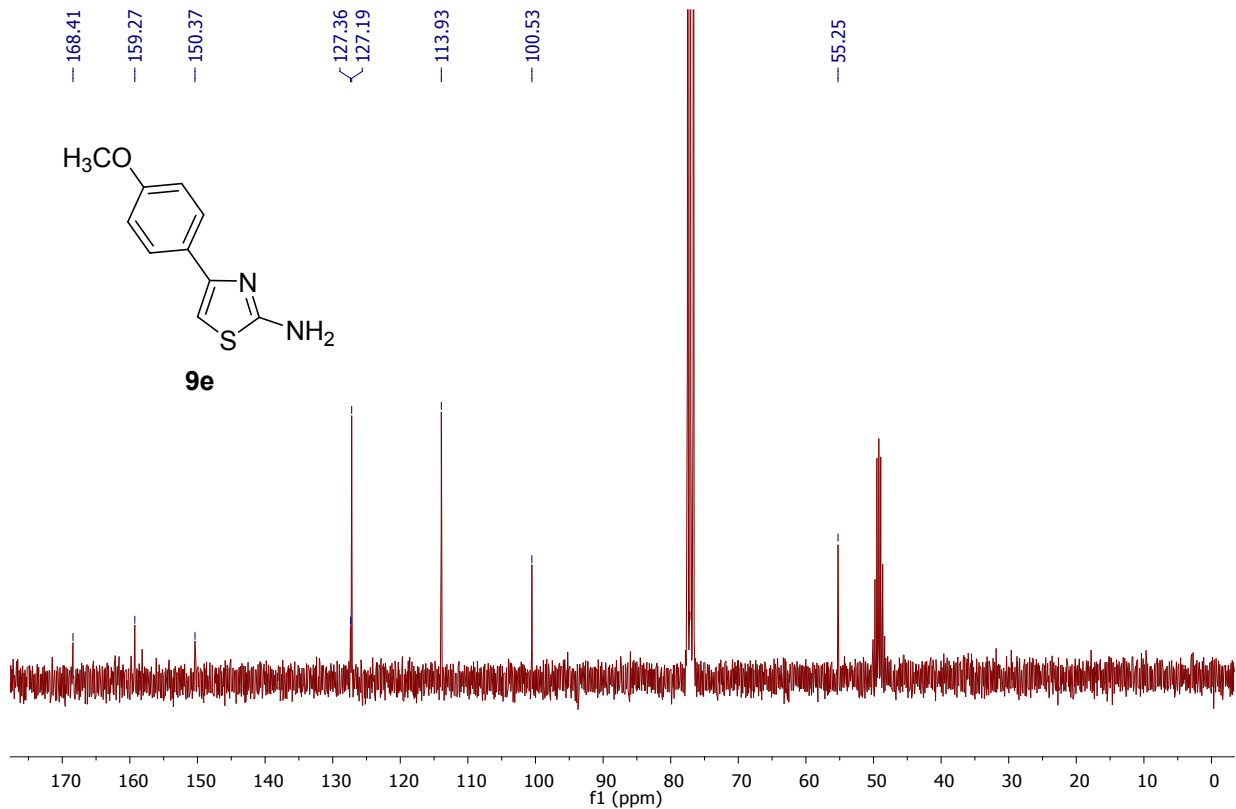

**SAMPLE INFORMATION**

|                   |                         |                     |                     |
|-------------------|-------------------------|---------------------|---------------------|
| Sample Name:      | S-348 aminothiazole     | Acquired By:        | System              |
| Sample Type:      | Unknown                 | Sample Set Name:    |                     |
| Vial:             | 1                       | Acq. Method Set:    | poonam              |
| Injection #:      | 47                      | Processing Method:  | S348 aminothiazoles |
| Injection Volume: | 10.00 ul                | Channel Name:       | 250.0nm             |
| Run Time:         | 12.0 Minutes            | Proc. Chnl. Descr.: | PDA 250.0 nm        |
| Date Acquired:    | 9/8/2014 12:23:24 AMIST |                     |                     |
| Date Processed:   | 9/8/2014 12:37:06 AMIST |                     |                     |

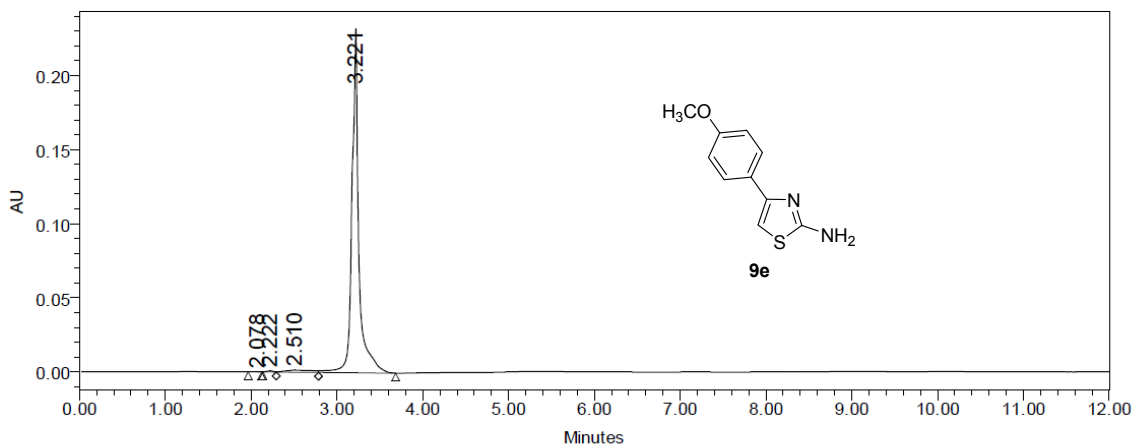

Channel: 2998; Processed Channel: PDA 250.0 nm; Result Id: 1531; Processing Method: S348 aminothiazoles

**Processed Channel Descr.: PDA 250.0 nm**

|   | Processed Channel Descr. | RT    | Area    | % Area | Height |
|---|--------------------------|-------|---------|--------|--------|
| 1 | PDA 250.0 nm             | 2.078 | 623     | 0.05   | 120    |
| 2 | PDA 250.0 nm             | 2.222 | 3709    | 0.28   | 810    |
| 3 | PDA 250.0 nm             | 2.510 | 30555   | 2.30   | 1407   |
| 4 | PDA 250.0 nm             | 3.221 | 1291758 | 97.37  | 232233 |

Reported by User: System  
 Report Method: Injection Summary Report  
 Report Method ID: 1005  
 Page: 1 of 1

Project Name: ANIL\_1  
 Date Printed: 9/8/2014  
 12:38:43 AM Asia/Calcutta

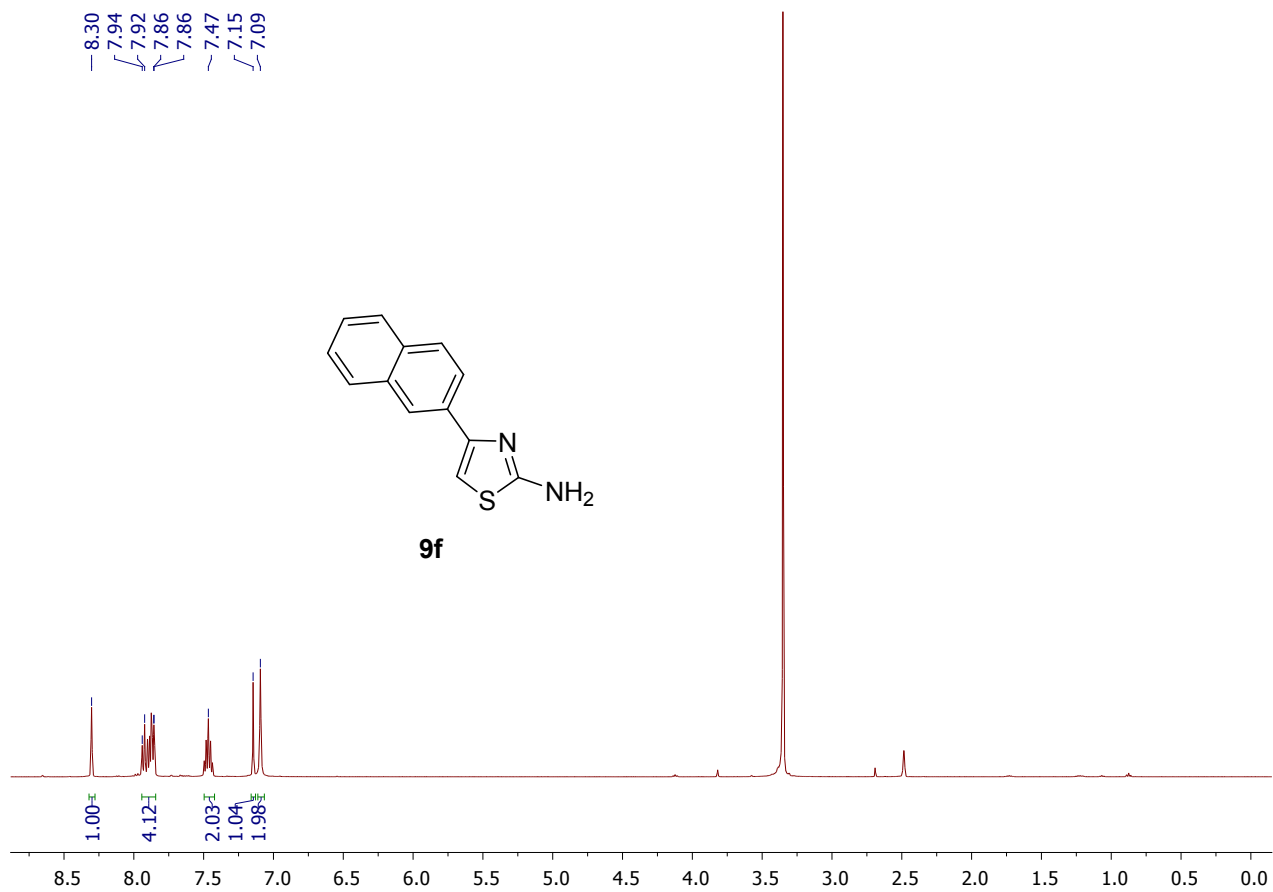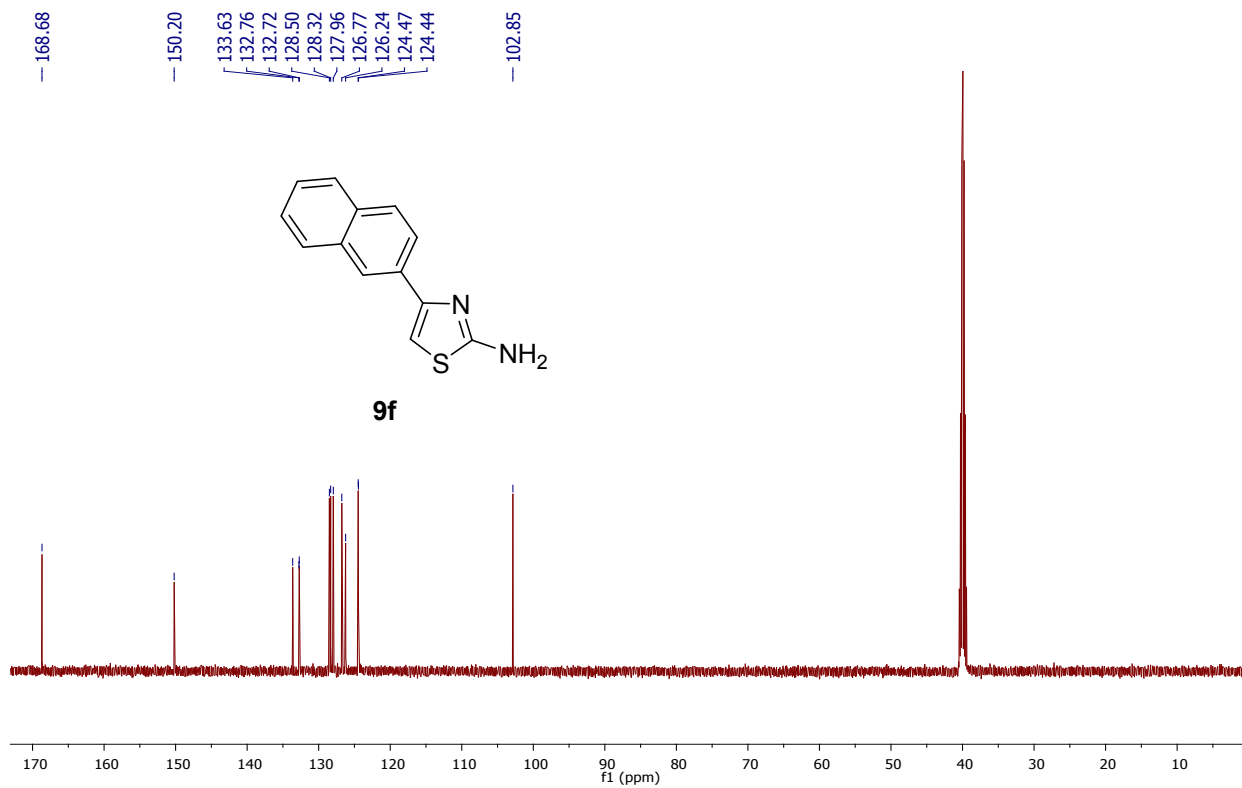

**SAMPLE INFORMATION**

|                   |                           |                     |              |
|-------------------|---------------------------|---------------------|--------------|
| Sample Name:      | 9f                        | Acquired By:        | System       |
| Sample Type:      | Unknown                   | Sample Set Name:    |              |
| Vial:             | 1                         | Acq. Method Set:    | poonam       |
| Injection #:      | 14                        | Processing Method:  | S14          |
| Injection Volume: | 10.00 ul                  | Channel Name:       | 250.0nm      |
| Run Time:         | 12.0 Minutes              | Proc. Chnl. Descr.: | PDA 250.0 nm |
| Date Acquired:    | 9/15/2014 12:29:41 AM IST |                     |              |
| Date Processed:   | 9/15/2014 12:46:31 AM IST |                     |              |

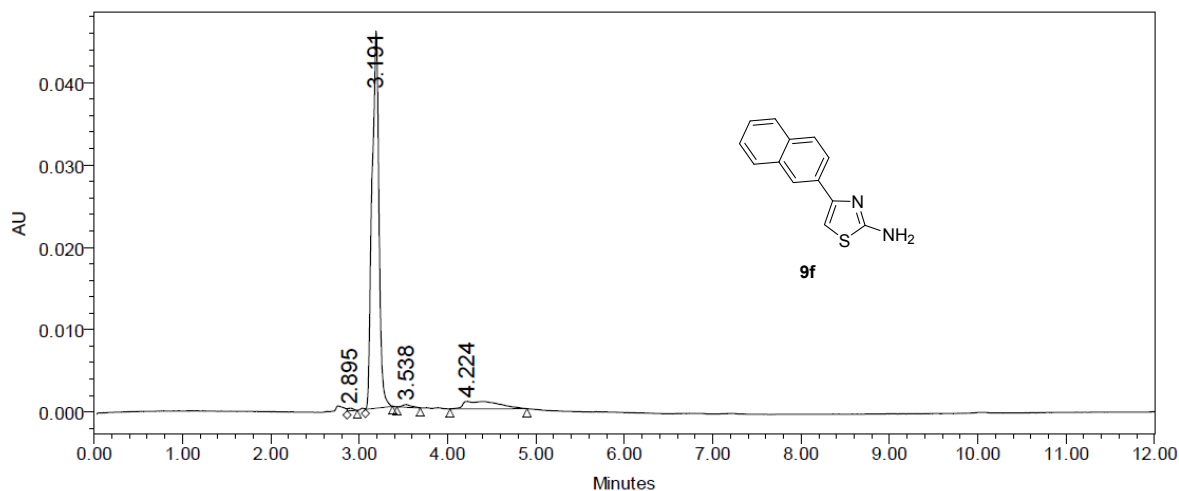

Channel: 2998; Processed Channel: PDA 250.0 nm; Result Id: 2340; Processing Method: S14

**Processed Channel Descr.: PDA 250.0 nm**

|   | Processed Channel Descr. | RT    | Area   | % Area | Height |
|---|--------------------------|-------|--------|--------|--------|
| 1 | PDA 250.0 nm             | 2.895 | 1402   | 0.50   | 323    |
| 2 | PDA 250.0 nm             | 3.191 | 249911 | 89.62  | 45766  |
| 3 | PDA 250.0 nm             | 3.538 | 2276   | 0.82   | 302    |
| 4 | PDA 250.0 nm             | 4.224 | 25270  | 9.06   | 887    |



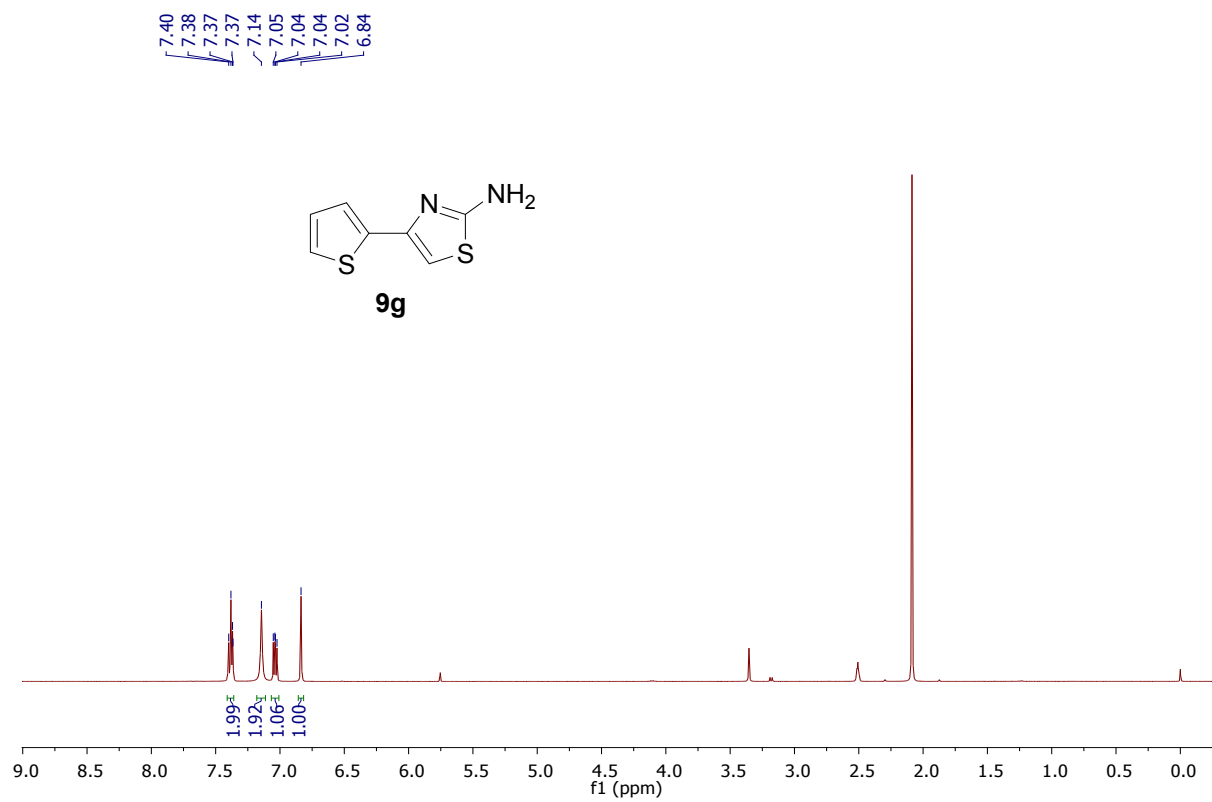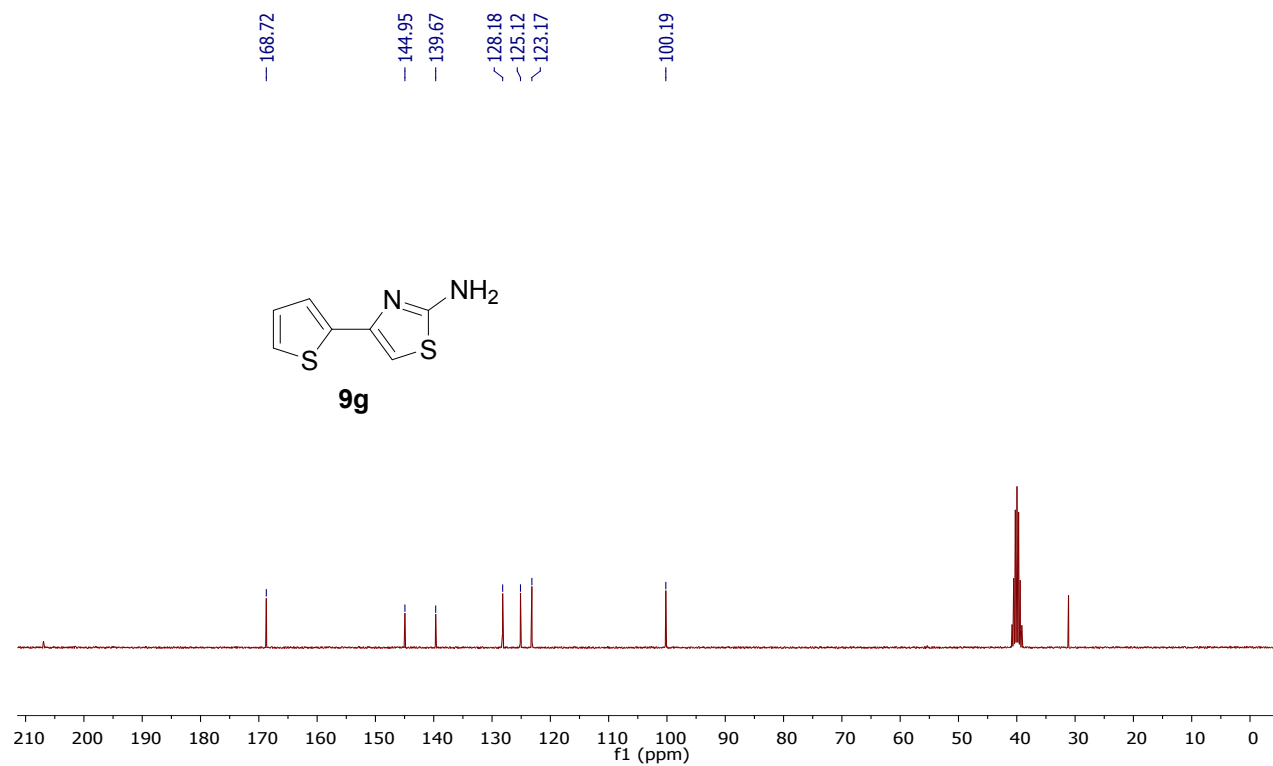

**SAMPLE INFORMATION**

|                   |                           |                     |              |
|-------------------|---------------------------|---------------------|--------------|
| Sample Name:      | Aminothiazole 819         | Acquired By:        | System       |
| Sample Type:      | Unknown                   | Sample Set Name:    |              |
| Vial:             | 1                         | Acq. Method Set:    | poonam       |
| Injection #:      | 25                        | Processing Method:  | S8           |
| Injection Volume: | 10.00 ul                  | Channel Name:       | 250.0nm      |
| Run Time:         | 12.0 Minutes              | Proc. Chnl. Descr.: | PDA 250.0 nm |
| Date Acquired:    | 9/13/2014 9:42:33 PM IST  |                     |              |
| Date Processed:   | 9/13/2014 10:00:45 PM IST |                     |              |

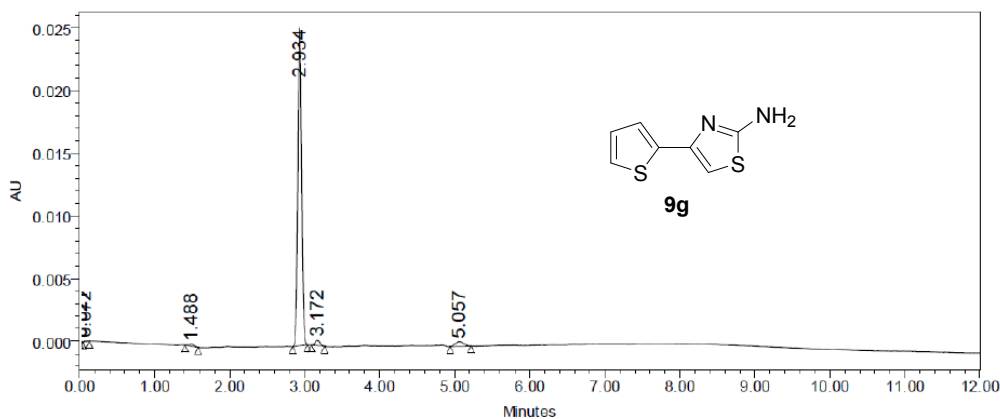

Channel: 2998; Processed Channel: PDA 250.0 nm; Result Id: 2208; Processing Method: S8

**Processed Channel Descr.: PDA  
250.0 nm**

|   | Processed Channel Descr. | RT    | Area  | % Area | Height |
|---|--------------------------|-------|-------|--------|--------|
| 1 | PDA 250.0 nm             | 0.021 | 53    | 0.05   | 41     |
| 2 | PDA 250.0 nm             | 0.072 | 96    | 0.10   | 37     |
| 3 | PDA 250.0 nm             | 1.488 | 732   | 0.76   | 145    |
| 4 | PDA 250.0 nm             | 2.934 | 90852 | 94.16  | 25382  |
| 5 | PDA 250.0 nm             | 3.172 | 1805  | 1.87   | 409    |
| 6 | PDA 250.0 nm             | 5.057 | 2952  | 3.06   | 379    |

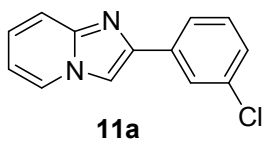

8.11  
7.96  
7.84  
7.64  
7.61  
7.35  
7.32  
7.30  
7.20  
7.18  
6.79

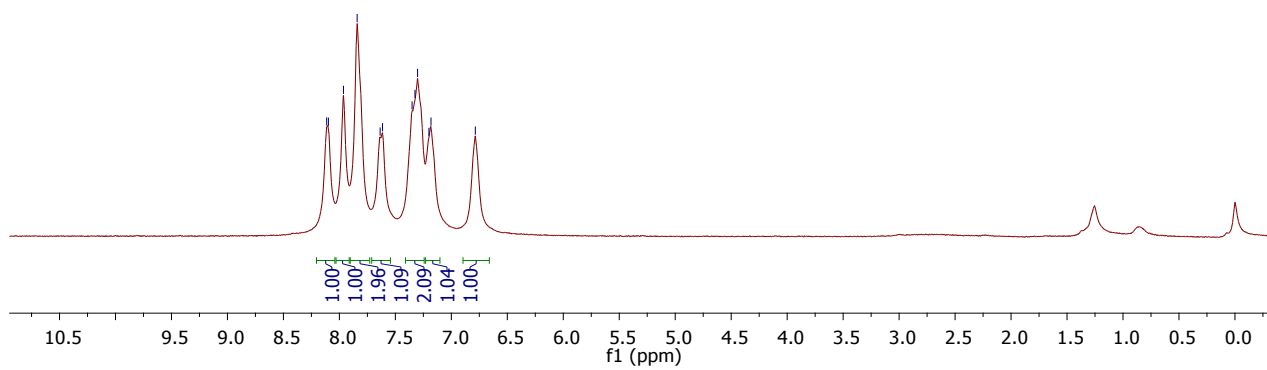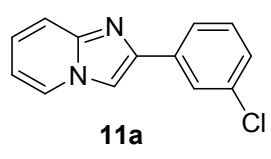

145.72  
144.41  
135.62  
134.75  
129.96  
127.90  
126.11  
125.66  
125.02  
124.07  
117.65  
112.69  
108.52

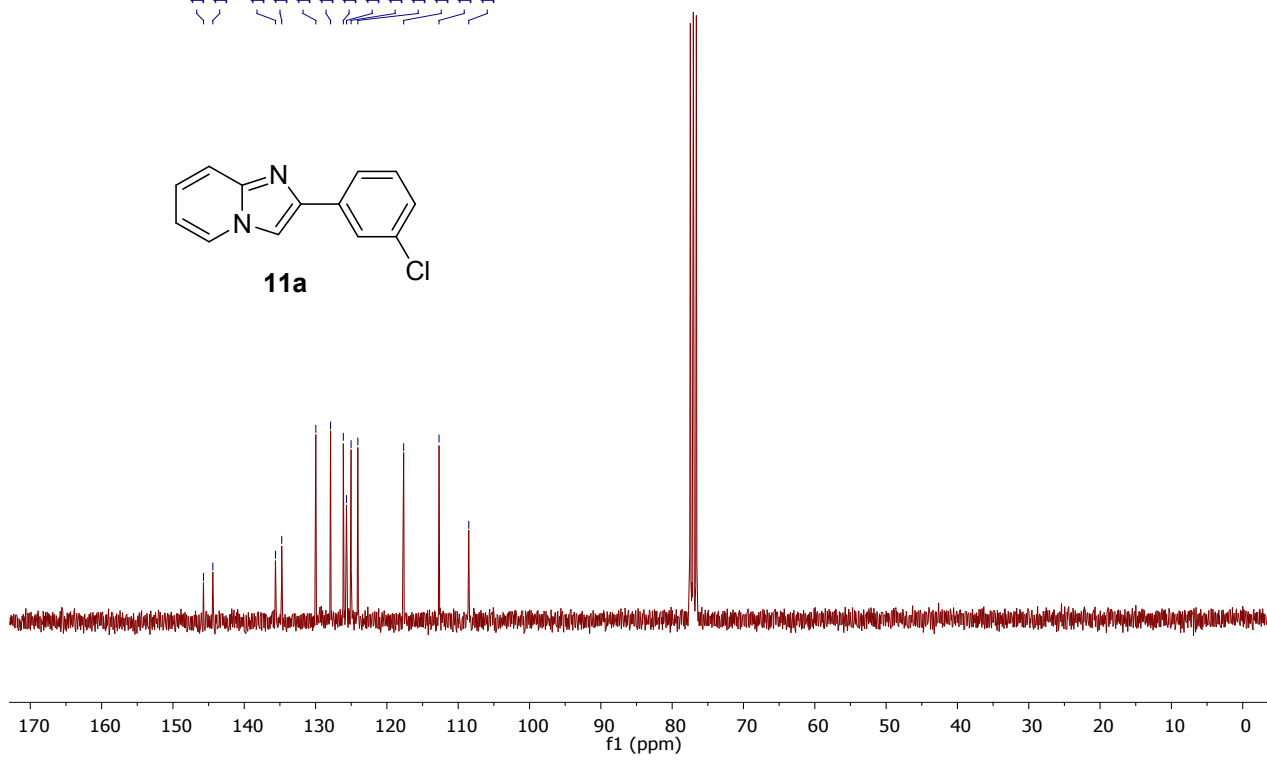



**SAMPLE INFORMATION**

|                   |                          |                     |              |
|-------------------|--------------------------|---------------------|--------------|
| Sample Name:      | 11a                      | Acquired By:        | System       |
| Sample Type:      | Unknown                  | Sample Set Name:    |              |
| Vial:             | 1                        | Acq. Method Set:    | poonam       |
| Injection #:      | 4                        | Processing Method:  | S15          |
| Injection Volume: | 10.00 ul                 | Channel Name:       | 250.0nm      |
| Run Time:         | 12.0 Minutes             | Proc. Chnl. Descr.: | PDA 250.0 nm |
| Date Acquired:    | 9/15/2014 6:36:21 PM IST |                     |              |
| Date Processed:   | 9/15/2014 6:57:41 PM IST |                     |              |

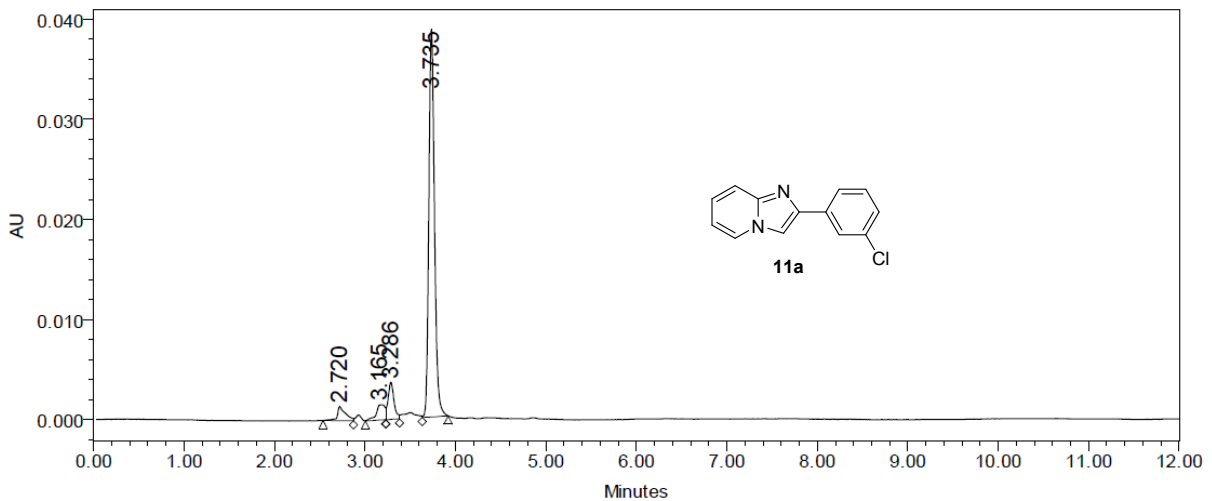

Channel: 2998; Processed Channel: PDA 250.0 nm; Result Id: 2460; Processing Method: S15

**Processed Channel Descr.: PDA 250.0 nm**

|   | Processed Channel Descr. | RT    | Area   | % Area | Height |
|---|--------------------------|-------|--------|--------|--------|
| 1 | PDA 250.0 nm             | 2.720 | 8694   | 4.29   | 1396   |
| 2 | PDA 250.0 nm             | 3.165 | 10141  | 5.00   | 1522   |
| 3 | PDA 250.0 nm             | 3.286 | 16853  | 8.31   | 3704   |
| 4 | PDA 250.0 nm             | 3.735 | 167029 | 82.39  | 38681  |

8.01  
7.99  
7.80  
7.78  
7.72  
7.55  
7.52  
7.32  
7.29  
7.11  
7.11  
6.99  
6.69  
6.66

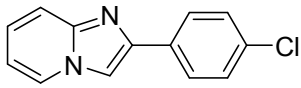

11b

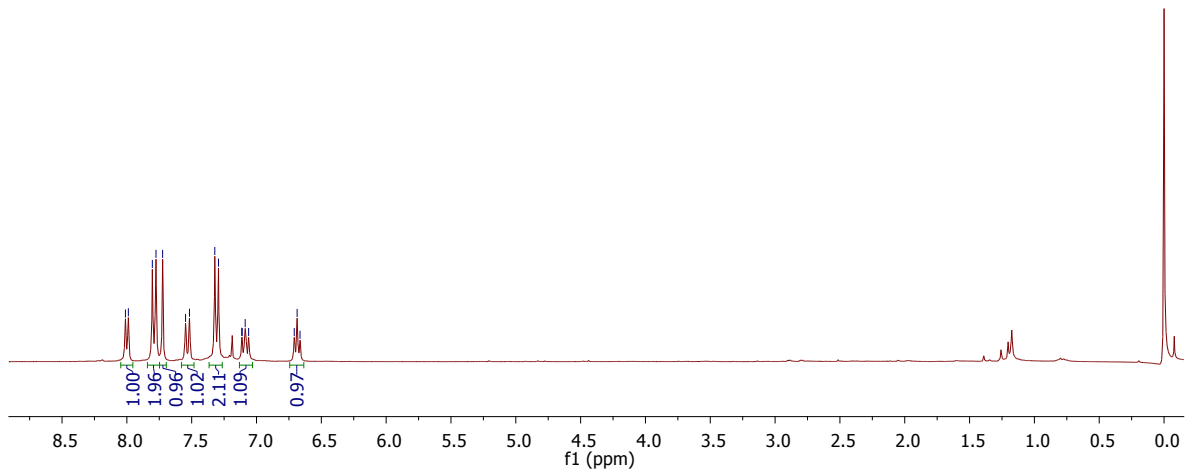

144.68  
143.62  
132.65  
131.26  
127.86  
126.24  
124.58  
123.91  
116.50  
111.58  
107.18

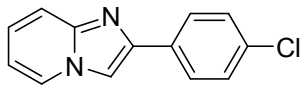

11b

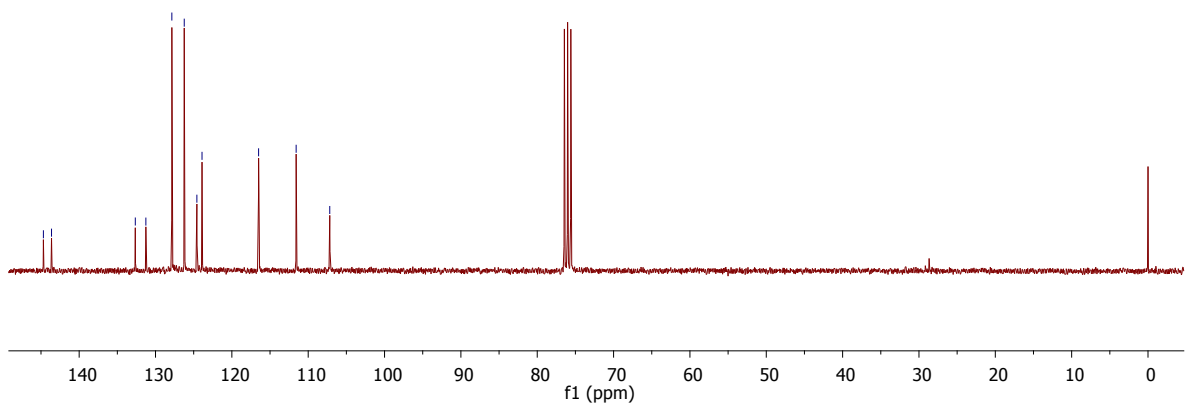

**SAMPLE INFORMATION**

|                   |                              |                     |                                |
|-------------------|------------------------------|---------------------|--------------------------------|
| Sample Name:      | 4chlorophenylimidazopyridine | Acquired By:        | System                         |
| Sample Type:      | Unknown                      | Sample Set Name:    |                                |
| Vial:             | 1                            | Acq. Method Set:    | poonam                         |
| Injection #:      | 19                           | Processing Method:  | 4chlorophenylimidazopyridine 1 |
| Injection Volume: | 10.00 ul                     | Channel Name:       | 250.0nm                        |
| Run Time:         | 12.0 Minutes                 | Proc. Chnl. Descr.: | PDA 250.0 nm                   |
| Date Acquired:    | 9/7/2014 5:13:29 PM IST      |                     |                                |
| Date Processed:   | 9/13/2014 4:47:31 PM IST     |                     |                                |

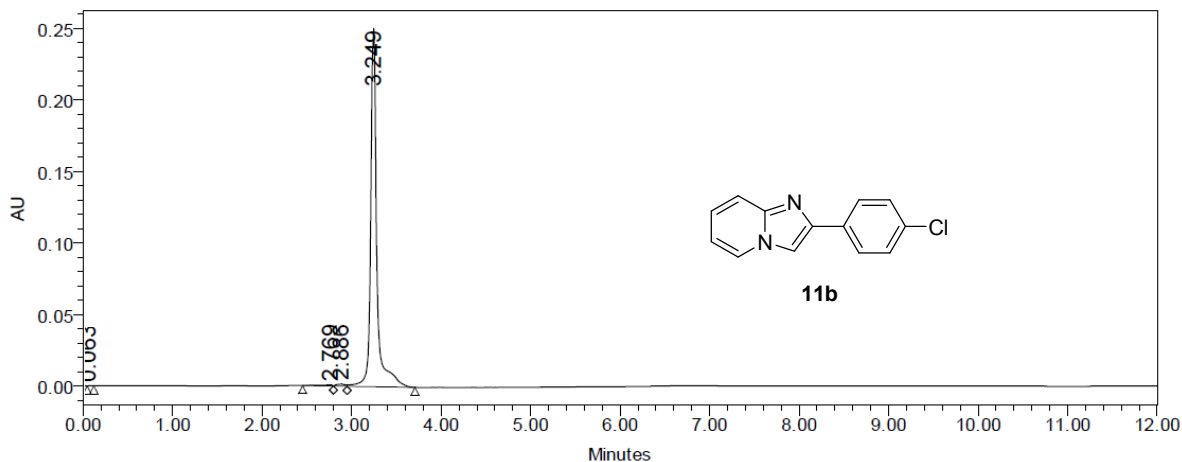

Channel: 2998; Processed Channel: PDA 250.0 nm; Result Id: 2077; Processing Method: 4chlorophenylimidazopyridine 1

**Processed Channel Descr.: PDA 250.0 nm**

|   | Processed Channel Descr. | RT    | Area    | % Area | Height |
|---|--------------------------|-------|---------|--------|--------|
| 1 | PDA 250.0 nm             | 0.063 | 108     | 0.01   | 40     |
| 2 | PDA 250.0 nm             | 2.769 | 7487    | 0.61   | 888    |
| 3 | PDA 250.0 nm             | 2.886 | 9605    | 0.79   | 1364   |
| 4 | PDA 250.0 nm             | 3.249 | 1201170 | 98.59  | 250449 |

8.10  
7.83  
7.62  
7.56  
7.19  
6.79

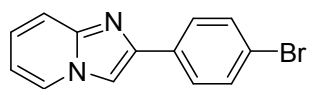

11c

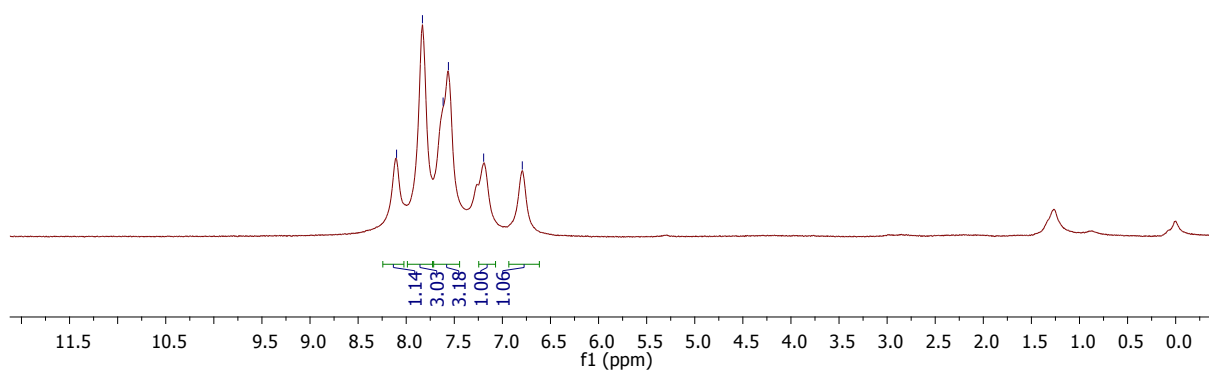

145.71  
144.64  
132.69  
131.84  
127.58  
125.62  
125.01  
121.90  
117.55  
112.67  
108.23

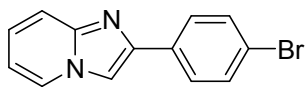

11c

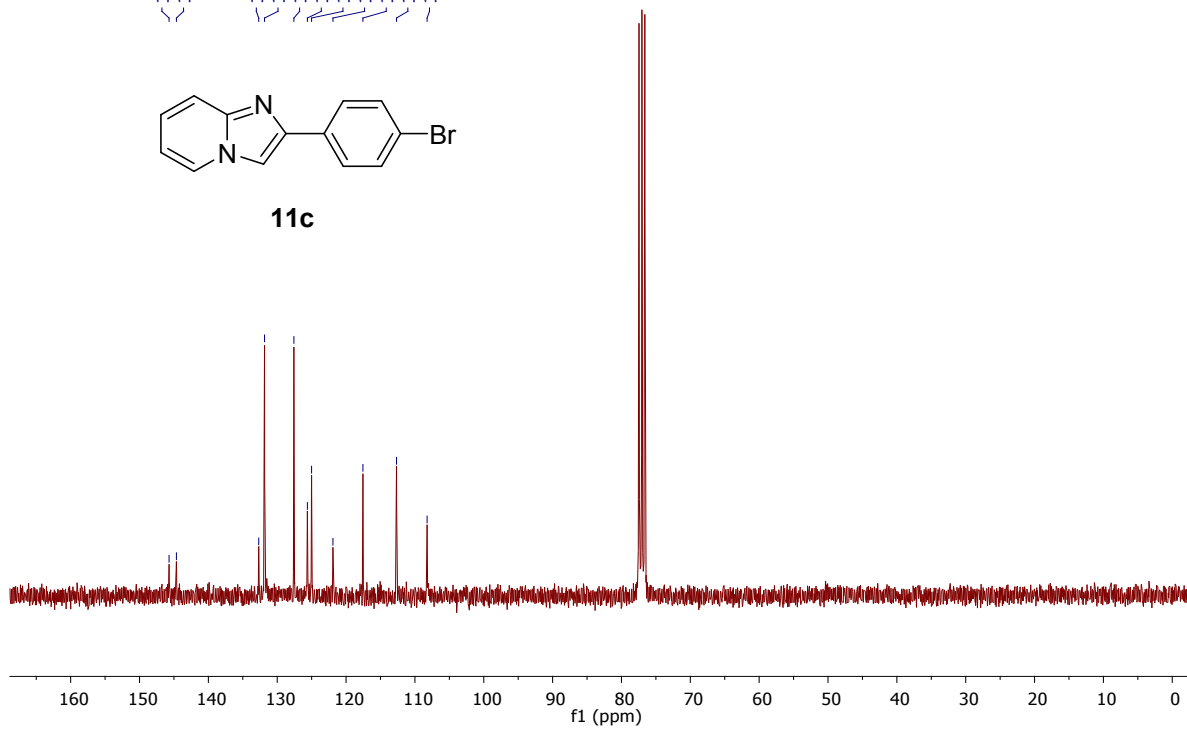



**SAMPLE INFORMATION**

|                   |                                |                     |                               |
|-------------------|--------------------------------|---------------------|-------------------------------|
| Sample Name:      | (4-bromophenyl)imidazopyridine | Acquired By:        | System                        |
| Sample Type:      | Unknown                        | Sample Set Name:    |                               |
| Vial:             | 1                              | Acq. Method Set:    | poonam                        |
| Injection #:      | 42                             | Processing Method:  | 4bromophenylimidazopyridine 1 |
| Injection Volume: | 10.00 ul                       | Channel Name:       | 250.0nm                       |
| Run Time:         | 12.0 Minutes                   | Proc. Chnl. Descr.: | PDA 250.0 nm                  |
| Date Acquired:    | 9/7/2014 12:41:30 AM IST       |                     |                               |
| Date Processed:   | 9/13/2014 4:50:36 PM IST       |                     |                               |

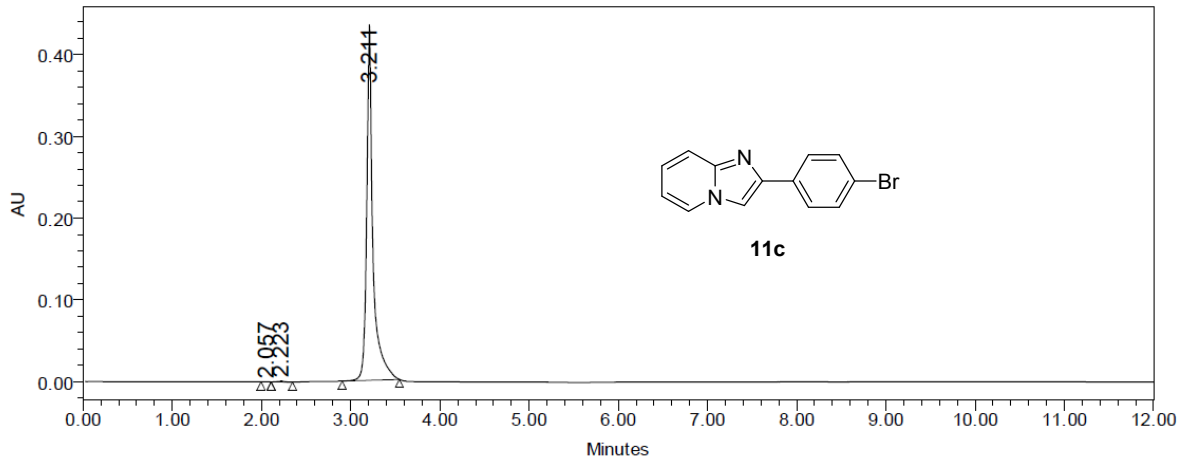

Channel: 2998; Processed Channel: PDA 250.0 nm; Result Id: 2080; Processing Method: 4bromophenylimidazopyridine 1

**Processed Channel Descr.: PDA 250.0 nm**

|   | Processed Channel Descr. | RT    | Area    | % Area | Height |
|---|--------------------------|-------|---------|--------|--------|
| 1 | PDA 250.0 nm             | 2.057 | 418     | 0.02   | 109    |
| 2 | PDA 250.0 nm             | 2.223 | 5934    | 0.28   | 1070   |
| 3 | PDA 250.0 nm             | 3.211 | 2115550 | 99.70  | 435424 |

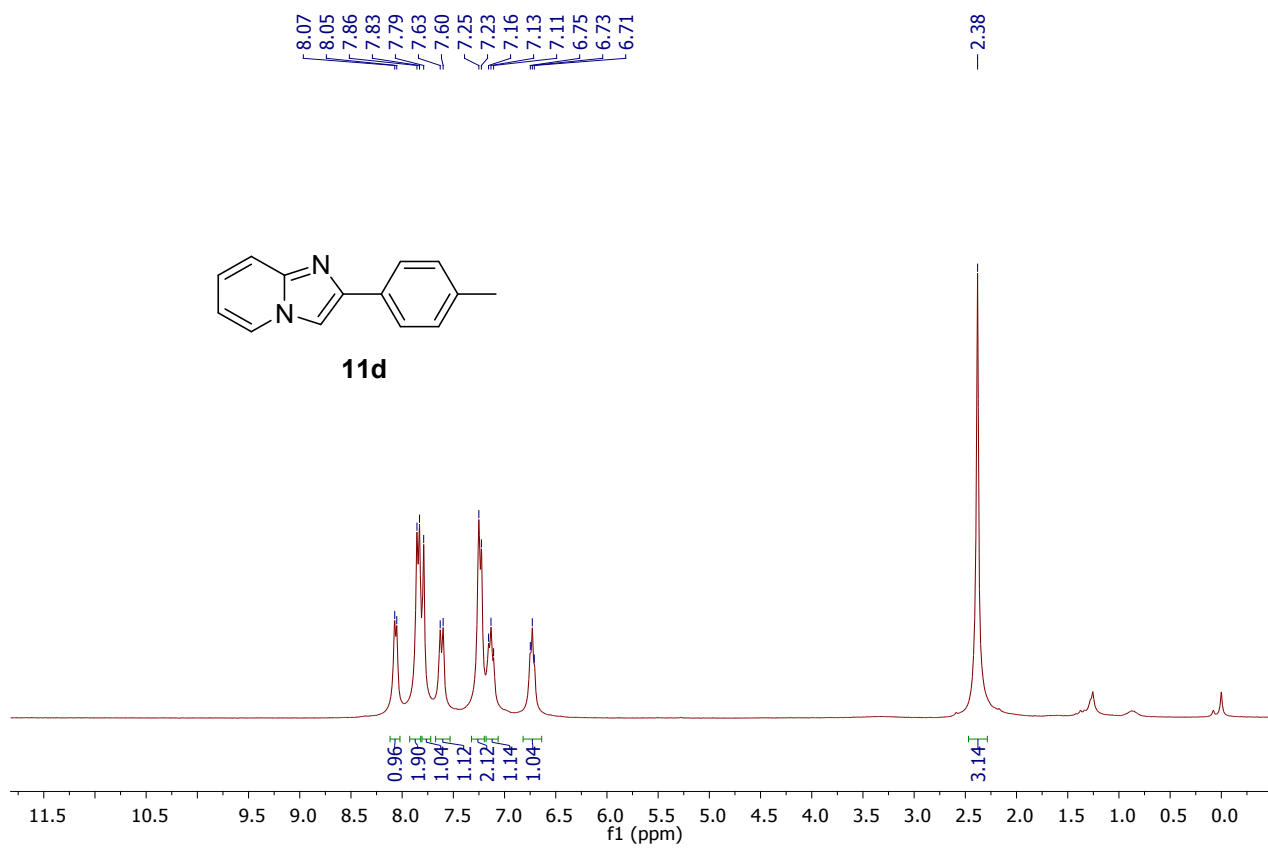

145.90  
145.61  
137.79  
130.92  
129.43  
125.95  
125.51  
124.50  
117.43  
112.29  
107.76

21.30

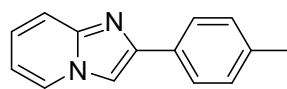

11d

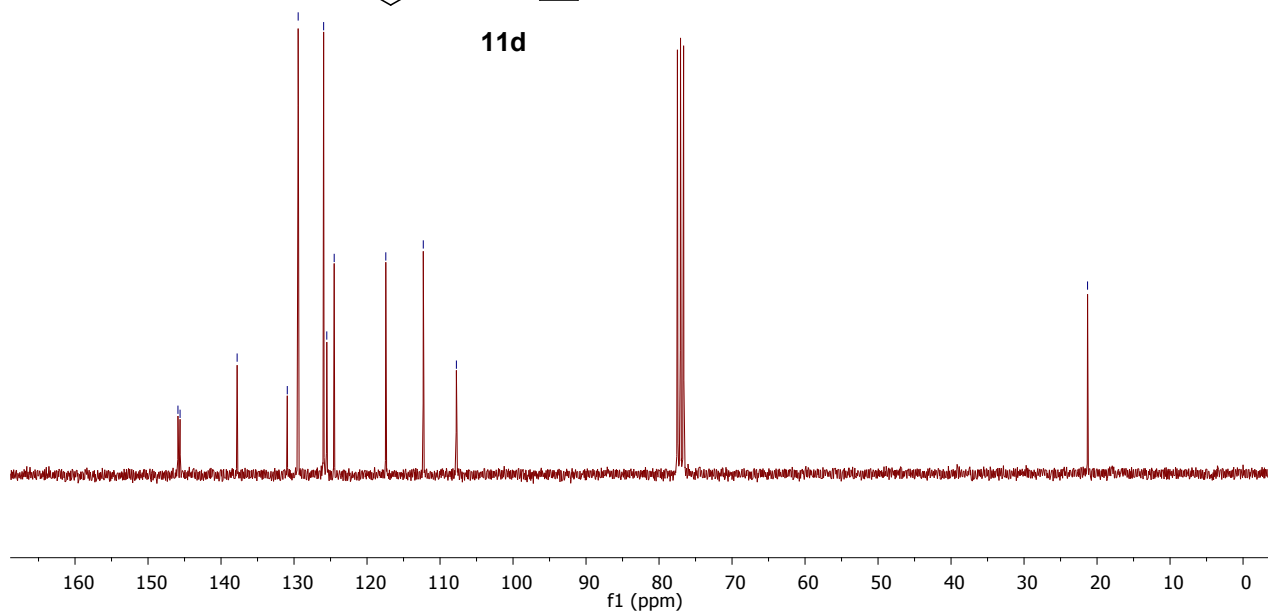

**SAMPLE INFORMATION**

|                   |                         |                     |              |
|-------------------|-------------------------|---------------------|--------------|
| Sample Name:      | S-341                   | Acquired By:        | System       |
| Sample Type:      | Unknown                 | Sample Set Name:    |              |
| Vial:             | 1                       | Acq. Method Set:    | poonam       |
| Injection #:      | 14                      | Processing Method:  | s341         |
| Injection Volume: | 10.00 ul                | Channel Name:       | 250.0nm      |
| Run Time:         | 20.0 Minutes            | Proc. Chnl. Descr.: | PDA 250.0 nm |
| Date Acquired:    | 9/6/2014 6:35:16 PM IST |                     |              |
| Date Processed:   | 9/6/2014 6:58:24 PM IST |                     |              |

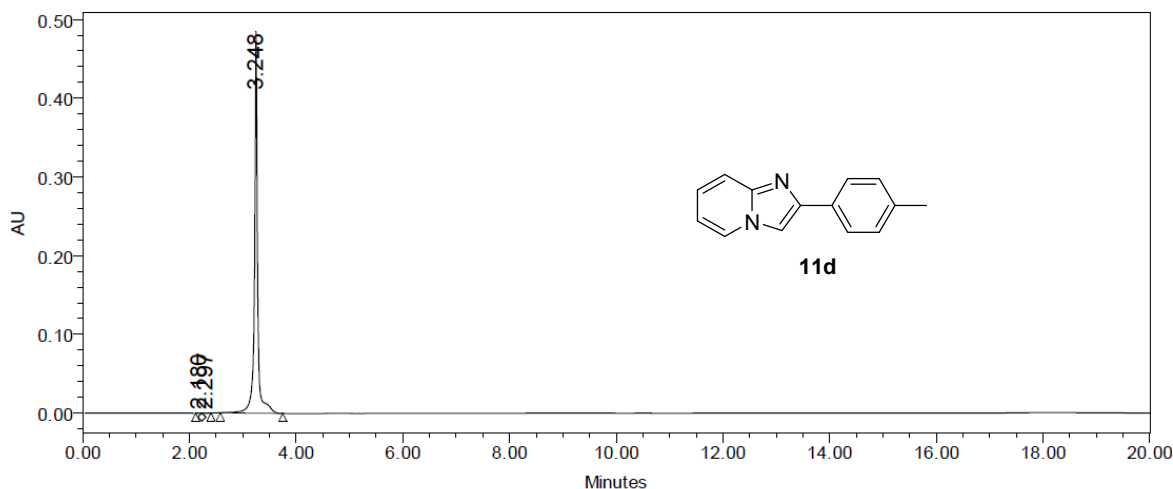

Channel: 2998; Processed Channel: PDA 250.0 nm; Result Id: 1243; Processing Method: s341

**Processed Channel Descr.: PDA 250.0 nm**

|   | Processed Channel Descr. | RT    | Area    | % Area | Height |
|---|--------------------------|-------|---------|--------|--------|
| 1 | PDA 250.0 nm             | 2.180 | 555     | 0.03   | 157    |
| 2 | PDA 250.0 nm             | 2.297 | 1395    | 0.07   | 246    |
| 3 | PDA 250.0 nm             | 3.248 | 1942544 | 99.90  | 484820 |

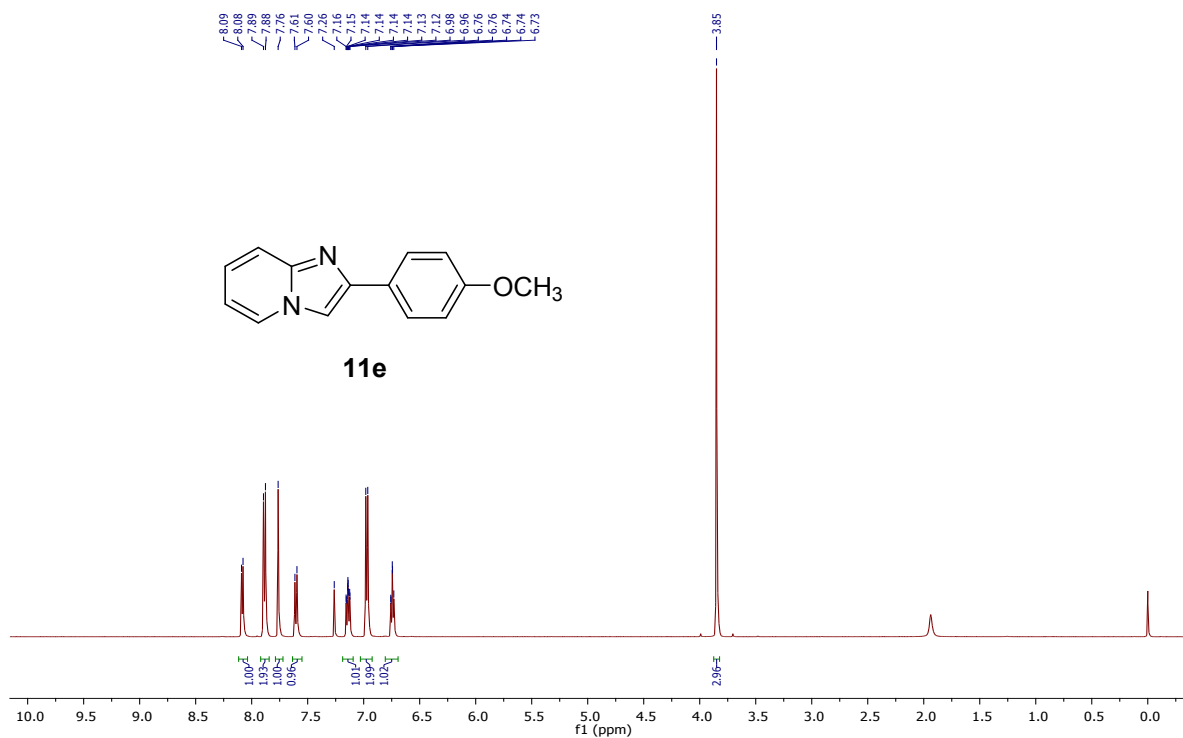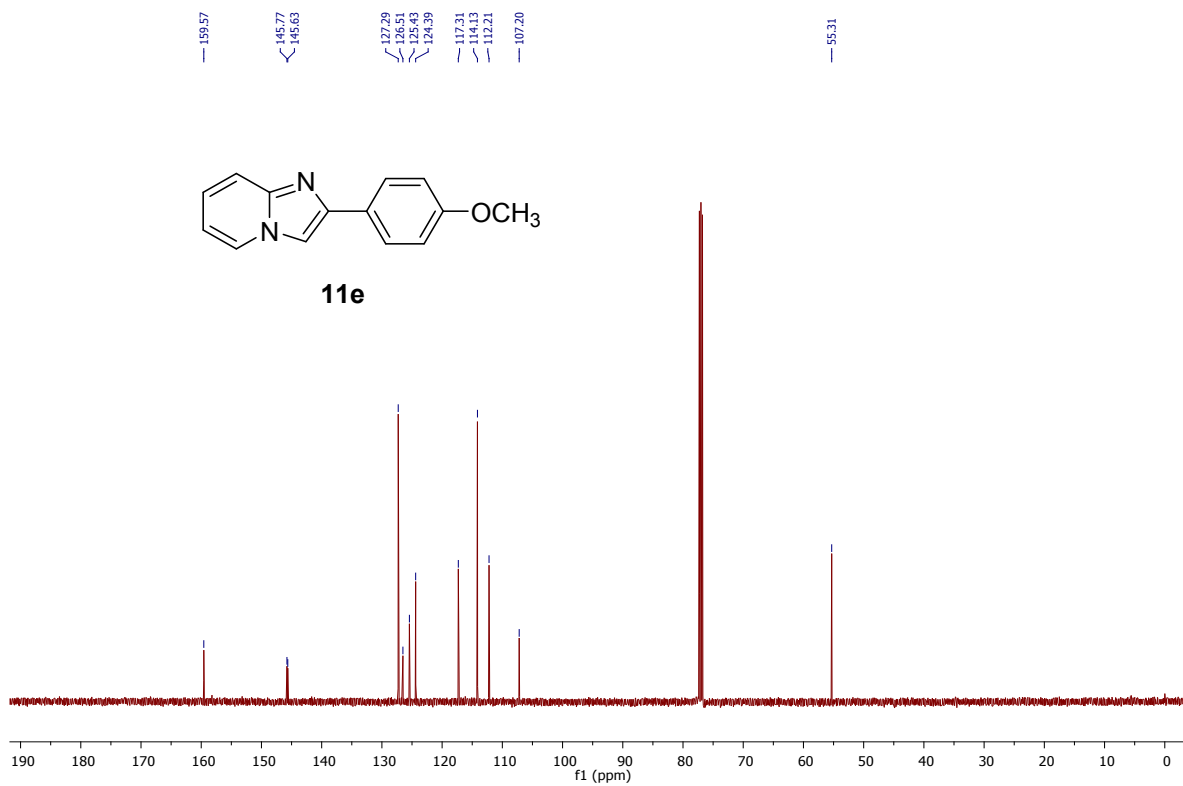

**SAMPLE INFORMATION**

|                                          |              |                     |              |
|------------------------------------------|--------------|---------------------|--------------|
| Sample Name:                             | S-357        | Acquired By:        | System       |
| Sample Type:                             | Unknown      | Sample Set Name:    |              |
| Vial:                                    | 1            | Acq. Method Set:    | poonam       |
| Injection #:                             | 36           | Processing Method:  | S7           |
| Injection Volume:                        | 10.00 ul     | Channel Name:       | 250.0nm      |
| Run Time:                                | 12.0 Minutes | Proc. Chnl. Descr.: | PDA 250.0 nm |
| Date Acquired: 9/6/2014 11:05:23 PM IST  |              |                     |              |
| Date Processed: 9/13/2014 9:47:21 PM IST |              |                     |              |

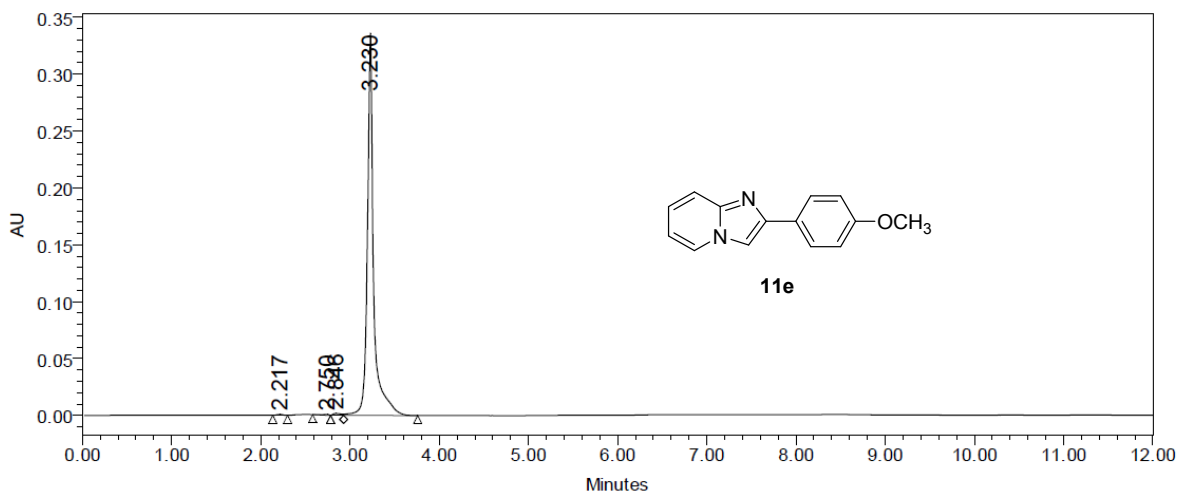

Channel: 2998; Processed Channel: PDA 250.0 nm; Result Id: 2205; Processing Method: S7

**Processed Channel Descr.: PDA 250.0 nm**

|   | Processed Channel Descr. | RT    | Area    | % Area | Height |
|---|--------------------------|-------|---------|--------|--------|
| 1 | PDA 250.0 nm             | 2.217 | 2946    | 0.18   | 726    |
| 2 | PDA 250.0 nm             | 2.750 | 3328    | 0.20   | 634    |
| 3 | PDA 250.0 nm             | 2.846 | 10318   | 0.62   | 1659   |
| 4 | PDA 250.0 nm             | 3.230 | 1639665 | 99.00  | 336202 |

8.52  
8.12  
8.10  
7.99  
7.95  
7.90  
7.87  
7.85  
7.83  
6.77

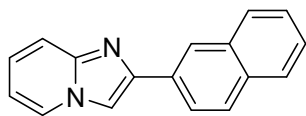

11f

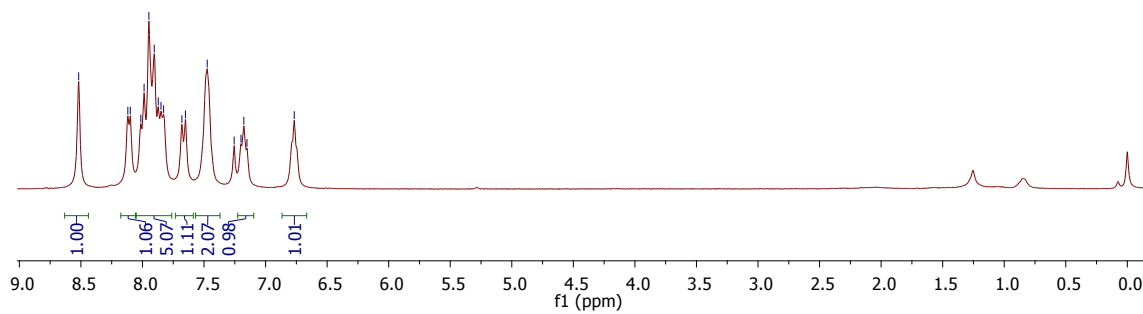

145.85  
145.76  
128.36  
128.31  
127.71  
126.28  
124.82  
124.77  
117.57  
112.47  
108.57

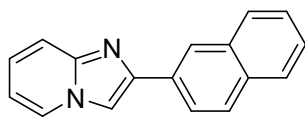

11f

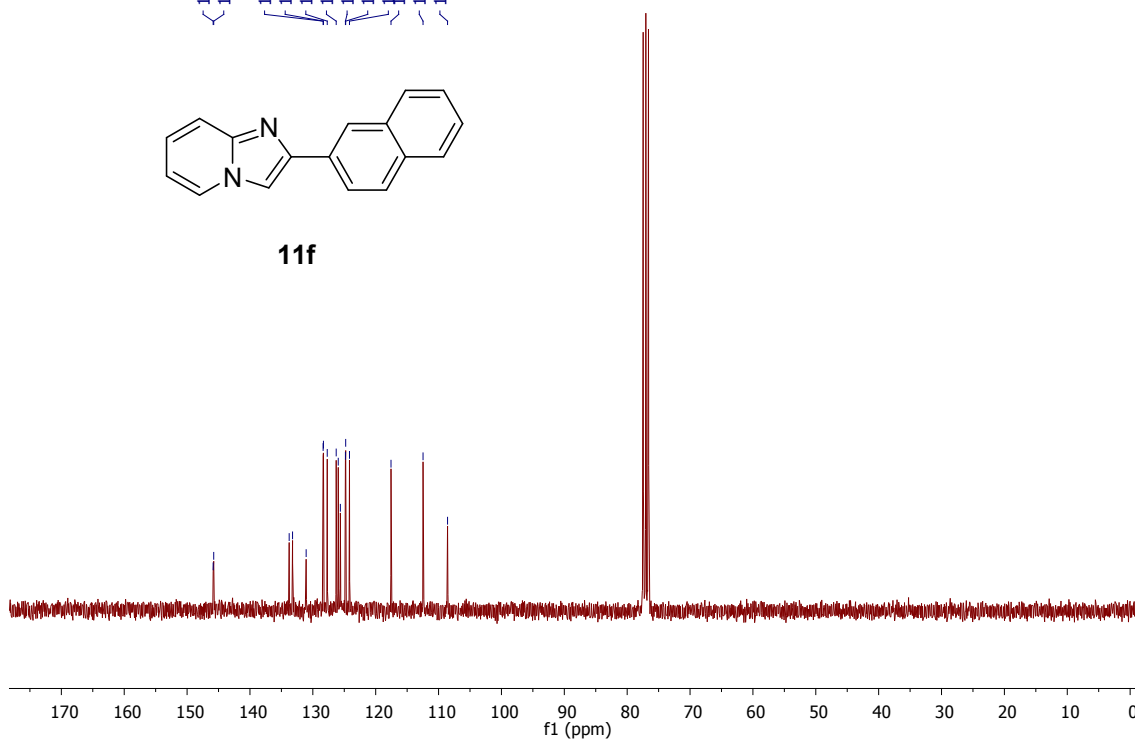

**SAMPLE INFORMATION**

|                   |                          |                     |              |
|-------------------|--------------------------|---------------------|--------------|
| Sample Name:      | naphthylimidazopyridine  | Acquired By:        | System       |
| Sample Type:      | Unknown                  | Sample Set Name:    |              |
| Vial:             | 1                        | Acq. Method Set:    | poonam       |
| Injection #:      | 21                       | Processing Method:  | S6           |
| Injection Volume: | 10.00 ul                 | Channel Name:       | 250.0nm      |
| Run Time:         | 12.0 Minutes             | Proc. Chnl. Descr.: | PDA 250.0 nm |
| Date Acquired:    | 9/13/2014 8:52:50 PM IST |                     |              |
| Date Processed:   | 9/13/2014 9:21:31 PM IST |                     |              |

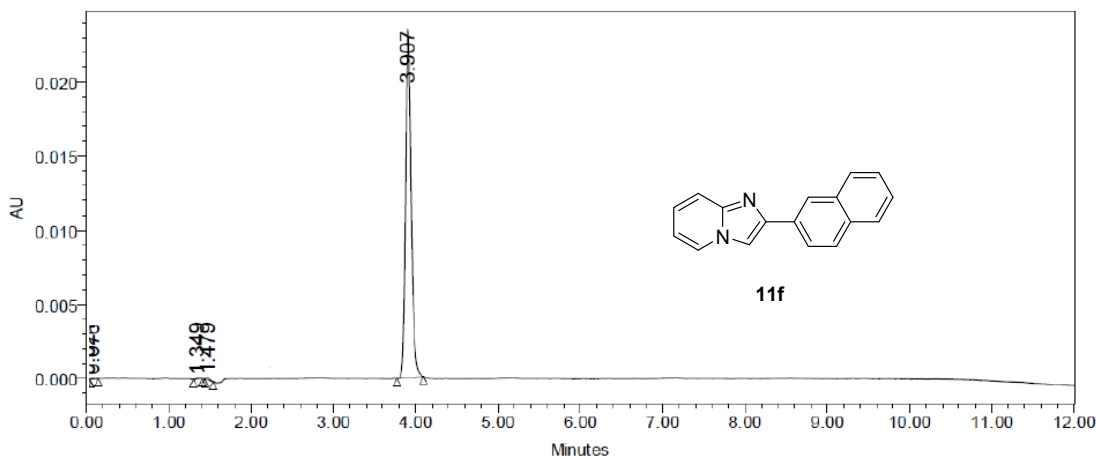

Channel: 2998; Processed Channel: PDA 250.0 nm; Result Id: 2193; Processing Method: S6

**Processed Channel Descr.: PDA 250.0 nm**

|   | Processed Channel Descr. | RT    | Area   | % Area | Height |
|---|--------------------------|-------|--------|--------|--------|
| 1 | PDA 250.0 nm             | 0.021 | 47     | 0.04   | 42     |
| 2 | PDA 250.0 nm             | 0.076 | 173    | 0.15   | 51     |
| 3 | PDA 250.0 nm             | 1.349 | 167    | 0.15   | 59     |
| 4 | PDA 250.0 nm             | 1.479 | 466    | 0.41   | 157    |
| 5 | PDA 250.0 nm             | 3.907 | 112142 | 99.25  | 23545  |



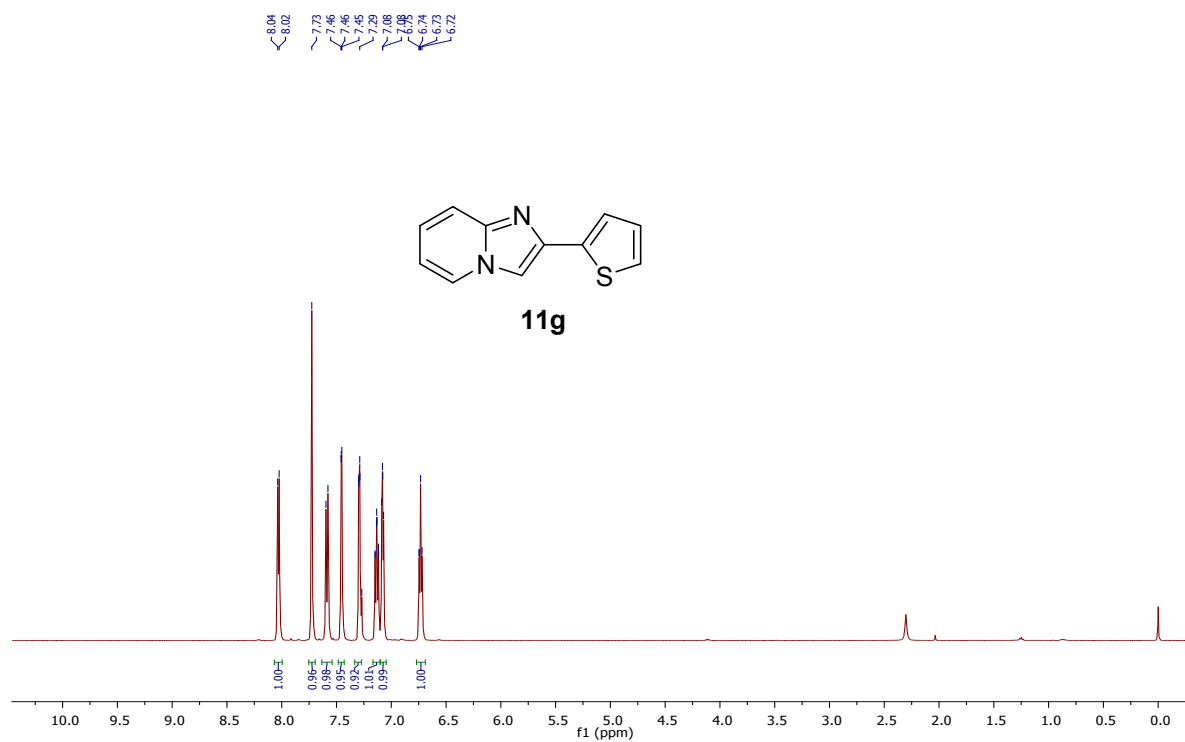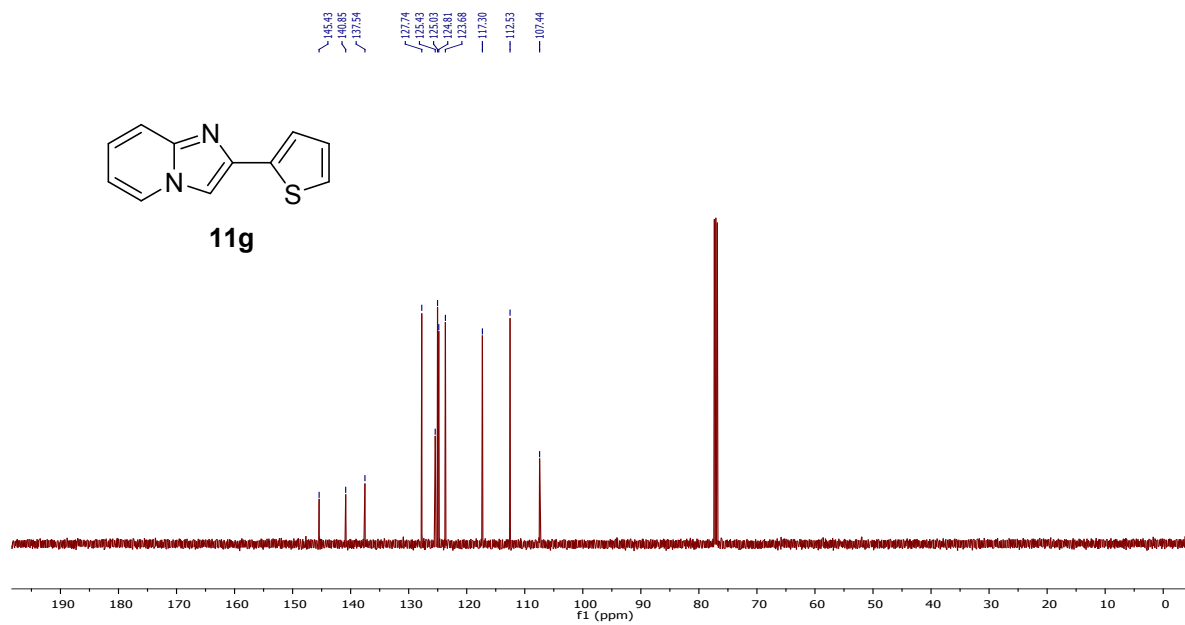

**SAMPLE INFORMATION**

|                   |                         |                     |                                |
|-------------------|-------------------------|---------------------|--------------------------------|
| Sample Name:      | S-336                   | Acquired By:        | System                         |
| Sample Type:      | Unknown                 | Sample Set Name:    |                                |
| Vial:             | 1                       | Acq. Method Set:    | poonam                         |
| Injection #:      | 30                      | Processing Method:  | S336 Thiophene imidazopyridine |
| Injection Volume: | 10.00 ul                | Channel Name:       | 250.0nm                        |
| Run Time:         | 12.0 Minutes            | Proc. Chnl. Descr.: | PDA 250.0 nm                   |
| Date Acquired:    | 9/7/2014 7:39:53 PM IST |                     |                                |
| Date Processed:   | 9/7/2014 7:55:03 PM IST |                     |                                |

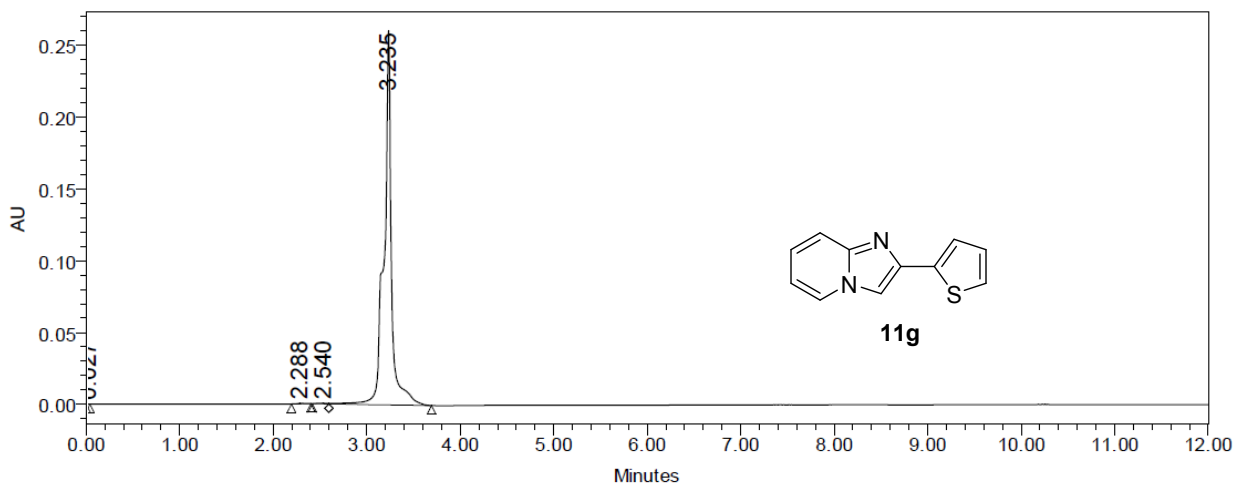

Channel: 2998; Processed Channel: PDA 250.0 nm; Result Id: 1467; Processing Method: S336 Thiophene imidazopyridine

**Processed Channel Descr.: PDA 250.0 nm**

|   | Processed Channel Descr. | RT    | Area    | % Area | Height |
|---|--------------------------|-------|---------|--------|--------|
| 1 | PDA 250.0 nm             | 0.027 | 36      | 0.00   | 32     |
| 2 | PDA 250.0 nm             | 2.288 | 1802    | 0.12   | 310    |
| 3 | PDA 250.0 nm             | 2.540 | 3471    | 0.24   | 484    |
| 4 | PDA 250.0 nm             | 3.235 | 1446239 | 99.63  | 260543 |
